# Supplementary material for: A Gene Family Derived from Transposable Elements during Early Angiosperm Evolution Has Reproductive Fitness Benefits in Arabidopsis thaliana
Source: PLoS Genet. 2012 Sep 6;8(9):e1002931. doi: 10.1371/journal.pgen.1002931 (PMC3435246; doi:10.1371/journal.pgen.1002931)
Supplement: Figure S2 — An alignment of MUG and MURA sequences. MUG sequences (A_M.G_10 and below) and MURA of MULEs (M_V.V_2 and above) are shown. Conserved domains are indicated by colored bars and active site residues by asterisks: MuDR (green), MULE (red), SWIM (orange). The CCHC residues of MuDR and CCCH residues of SWIM are conserved in MUG sequences; however, most have mutations to at least one of the DDE residues of the MULE domain. (PDF) [file pgen.1002931.s002.pdf]

|            |     |             |        |         |         |          |       |     |       |      |        |       |       |    |      |      |      |        |      |    |       |      |   |
|------------|-----|-------------|--------|---------|---------|----------|-------|-----|-------|------|--------|-------|-------|----|------|------|------|--------|------|----|-------|------|---|
| T.O.S.10   | 19  | GVPTPEFLMGT | PSCKKQ | LTATAYG | LKRAKFI | ENFVDDPK | KVRVR | DDP | PCWV  | SCWV | CLLSKN | -     | SRDGO | VL | TENS | HLCP | -    | SRRNCK | LVT  | SS | IAEKY | K215 |   |
| T.V.V.1    | 253 | KYSV        | KGQ    | LE      | LT      | SLA      | QFKEA | LI  | EWNLV | GL   | IF     | FEKND | KVRV  | VI | KDQ  | GL   | CFAL | LYS    | SGDK | HT | FRMR  | K216 |   |
| T.V.V.1    | 165 | ENS         | IMSG   | HT      | PP      | NAAK     | F     | DAV | YLS   | MS   | LAGR   | FY    | CFKRN | S  | KHMT | VT   | CVN  | EC     | PKW  | VT | AR    | A1   |   |
| T.V.V.1    | 181 | KAI         | LE     | KG      | LE      | Q        | LE    | Q   | LE    | Q    | LE     | Q     | LE    | Q  | LE   | Q    | LE   | Q      | LE   | Q  | LE    | Q    |   |
| M.V.V.7    | 211 | SDH         | LE     | Q       | LE      | Q        | LE    | Q   | LE    | Q    | LE     | Q     | LE    | Q  | LE   | Q    | LE   | Q      | LE   | Q  | LE    | Q    |   |
| B.M.G.10   | 132 | RK          | IR     | GE      | NI      | Q        | LE    | Q   | LE    | Q    | LE     | Q     | LE    | Q  | LE   | Q    | LE   | Q      | LE   | Q  | LE    | Q    |   |
| A.M.G.3    | 2   | E           | G      | H       | F       | I        | T     | E   | G     | H    | F      | I     | T     | E  | G    | H    | F    | I      | T    | E  | G     | H    |   |
| A.M.T.6    | 46  | -----       | TE     | P       | D       | V        | K     | A   | F     | R    | N      | A     | I     | E  | A    | A    | I    | E      | A    | A  | I     | E    |   |
| A.C.F.4    | 2   | H           | H      | F       | I       | T        | E     | G   | H     | F    | I      | T     | E     | G  | H    | F    | I    | T      | E    | G  | H     | F    |   |
| A.V.3      | 2   | P           | D      | V       | K       | A        | F     | R   | N     | A    | I      | E     | A     | A  | I    | E    | A    | A      | I    | E  | A     | A    |   |
| A.Z.M.3    | 17  | G           | S      | R       | T       | L        | V     | I   | Q     | E    | E      | A     | D     | V  | T    | C    | R    | R      | A    | V  | K     | D    |   |
| A.Z.M.9    | 17  | G           | S      | R       | T       | L        | V     | I   | Q     | E    | E      | A     | D     | V  | T    | C    | R    | R      | A    | V  | K     | D    |   |
| A.O.S.5    | 32  | V           | E      | O       | G       | L        | V     | I   | Q     | E    | E      | A     | D     | V  | T    | C    | R    | R      | A    | V  | K     | D    |   |
| A.B.D.3    | 53  | Q           | E      | O       | G       | L        | V     | I   | Q     | E    | E      | A     | D     | V  | T    | C    | R    | R      | A    | V  | K     | D    |   |
| A.A.T.MUG4 | 17  | T           | E      | H       | V       | L        | A     | V   | I     | Q    | E      | E     | A     | D  | V    | T    | C    | R      | R    | A  | V     | K    | D |
| A.M.C.4    | 41  | V           | S      | H       | T       | L        | V     | I   | Q     | E    | E      | A     | D     | V  | T    | C    | R    | R      | A    | V  | K     | D    |   |
| A.M.T.2    | 16  | A           | E      | O       | G       | L        | V     | I   | Q     | E    | E      | A     | D     | V  | T    | C    | R    | R      | A    | V  | K     | D    |   |
| A.C.V.9    | 24  | V           | D      | H       | T       | L        | V     | I   | Q     | E    | E      | A     | D     | V  | T    | C    | R    | R      | A    | V  | K     | D    |   |
| A.V.1      | 16  | I           | Q      | G       | L       | V        | I     | Q   | E     | E    | A      | D     | V     | T  | C    | R    | R    | A      | V    | K  | D     |      |   |
| A.A.T.MUG3 | 152 | T           | H      | E       | M       | V        | L     | A   | V     | I    | Q      | E     | E     | A  | D    | V    | T    | C      | R    | R  | A     | V    | K |
| A.B.D.3    | 176 | E           | N      | T       | L       | V        | I     | Q   | E     | E    | A      | D     | V     | T  | C    | R    | R    | A      | V    | K  | D     |      |   |
| A.C.F.3    | 37  | E           | N      | H       | E       | I        | T     | E   | G     | H    | F      | I     | T     | E  | G    | H    | F    | I      | T    | E  | G     | H    |   |
| A.M.C.2    | 19  | V           | O      | E       | L       | T        | V     | I   | Q     | E    | E      | A     | D     | V  | T    | C    | R    | R      | A    | V  | K     | D    |   |
| A.M.T.1    | 85  | P           | T      | L       | V       | I        | Q     | E   | E     | A    | D      | V     | T     | C  | R    | R    | A    | V      | K    | D  |       |      |   |
| A.V.6      | 173 | P           | N      | H       | E       | L        | V     | I   | Q     | E    | E      | A     | D     | V  | T    | C    | R    | R      | A    | V  | K     | D    |   |
| A.M.C.1    | 145 | P           | N      | F       | E       | I        | H     | V   | I     | Q    | E      | E     | A     | D  | V    | T    | C    | R      | R    | A  | V     | K    |   |
| A.A.T.MUG1 | 178 | M           | T      | L       | V       | I        | Q     | E   | E     | A    | D      | V     | T     | C  | R    | R    | A    | V      | K    | D  |       |      |   |
| A.V.4      | 171 | P           | S      | L       | V       | I        | Q     | E   | E     | A    | D      | V     | T     | C  | R    | R    | A    | V      | K    | D  |       |      |   |
| A.B.D.2    | 95  | T           | E      | F       | Q       | L        | V     | I   | Q     | E    | E      | A     | D     | V  | T    | C    | R    | R      | A    | V  | K     | D    |   |
| A.B.D.1    | 168 | T           | E      | F       | Q       | L        | V     | I   | Q     | E    | E      | A     | D     | V  | T    | C    | R    | R      | A    | V  | K     | D    |   |
| A.O.S.1    | 170 | S           | E      | F       | Q       | L        | V     | I   | Q     | E    | E      | A     | D     | V  | T    | C    | R    | R      | A    | V  | K     | D    |   |
| A.V.3      | 163 | P           | E      |         |         |          |       |     |       |      |        |       |       |    |      |      |      |        |      |    |       |      |   |
