# Supplementary material for: A Gene Family Derived from Transposable Elements during Early Angiosperm Evolution Has Reproductive Fitness Benefits in Arabidopsis thaliana
Source: PubMed Central journal article supplement (PMC3435246; doi:10.1371/journal.pgen.1002931), 2012-09-06
Supplement: pgen.1002931.s001.pdf [file pgen.1002931.s001.pdf]

Figure S1.

>AtMUG1

MANRDLMLGQNRNIGIGQGQSLVLGHSLSLGLGQNHVDVELGQGHNMDLGLAHHDDHHE  
IDLGNPHDDHELDELGNSEDQDGEDHHHHHHHDYMNENEISVDQKPGHDDVDPDLVSSQN  
HEFSLSDNNHQLVGENHELDNLELAVDSSHELEIDQHGEMVMVSTPVQARALTADMTY  
QLTVGQEFDPVKSCRRALRDMAIALHFEMQTIKSDKTRFTAKCSSDGC PWRVHA AKLPGV  
PTFTIRTIHESHSCGGINHLGHQQASVQWVASSVEQRLRENPNCKPKEILEEIH RVHGIT  
LSYKQAWRGKERIMATMRGSFE EGYRLLPQYCEQVKRTNPGSIASVYGSPADNCFQRLFI  
SFQASIYGF LNACRPLLLGLDRTYL KSKYLG TLLLATGFDGDGALFPLAFGIVDEENDENW  
MMFLCELHNLL ETNTENMPRLTILSDRQKGIVEGVEQNFP TAFHGFCMRHLSSEFRKEFN  
NTLLVNYLWEAAQALTVIEFEAKILEIEEISQDAAYWIRRI PRLWATAYFEGQRFGHLT  
ANIVESLNSWIAEASGLPIIQMMECIRRQLMTWFNERRETSMQWTSILVPTAERRVAEAL  
ELARTYQVLRANEAEFEVISHEGNNIVDIRNRCCLCRGWQLYGLPCAHAVAALLSCRQNV  
HRFTESCFTVATYRKTYSTIHPIDKSHWRELESGDPNVNKAALDAIINPPKSLRPPGR  
PRKRRVRAEDRGRVVRVHCSRNCQTGHFR TTTCAAPI

>AtMUG2

MTNNELIMSGNHDISFRQEQYMEARQNNELFTSHDYNFALEPLQETNLQIGVSREQNEVW  
NHGQEHALALQNSGTHSEEIHEKQLVEGKDEVDSQENQNESYDHTFDL SFPDNDSDGTSE  
NDKLALLVSQDLNDNLQLAVGHCMNRDPLPGLNISLSQQL ELAPPILQCRSLQTAP EHNL  
IVGMEFSDVLACRRALRDAIALRFEMQTVKSDKTRFTAKCNSEGCPWR IHC AKL PGLPT  
FTIRTIHGSHTCGGISHLGHQQASVQWVADAVTERLKVNP HCKPKEILEEQIHQVHGITLT  
YKQAWRGKERIMAAVRGSY EEDYRLLPRYCDQIRRTNPGSVAVVHGSPVDG SFQQFFISF  
QASICGFLNACRPLIGLDRTVL KSKYVGTLLLATGFDGEGAVFPLAF AIISEENDSSWQW  
FLSELRQLLEVNSENMPKLTILSSRDQSIVDGVD TNFPTAFHGLCVHCLTESVRTQFNNS  
ILVNLVWEAAKCLTDFEFEGKMG EIAQISPEAASWIRNIQHSQWATYCFEGTRFGHLTAN  
VSESLNSWVQDASGLPIIQMLESIRRQLMTLFNERRETSMQW SGM L VPSAERHVLEAIEE  
CRLYPVHKANEAEFEVMTSEGWIVDIRCRTCYCRGWEL YGLPCSHAVAALLACRQNVYR  
FTESYFTVANYRRTYAETIHPVPDKTEWKTTEPAGESGEDGEEIVIRPPRDLRQPPRPPK  
RRSQGEDRGRQKRVVRC SRCNQA GHFR TTTCTAPI

>AtMUG3

MANDELKSENRDISFRQDHFTGSRHNYELFVGHDYNSAFEQLLDINLQIGASCNGNELW  
NNLQDHRGIDETKEVA CLDVNQNDGYRSFPDNDSEIDKSTVIEATGAIHKVESQD TDDK  
LELEMSQSTEF SQSVMPSPSSQCWSMSGAGTDHEMVVGMEFSDAYACRRAIKNAAISLR  
FEMRTIKSDKTRFTAKCNSKGC PWR IHC AKVSNAPTFTIRTIHGSHTCGGISHLGHQQAS  
VQWVADVVAEKLENPHFKPKEILEE IYRVHGISLSYKQAWRGKERIMATLRG STL RGSF  
EEERYLLPQYCD EIRRSNPGSVAVVHVNPIDGCFQHLFISFQASISGFLNACRPLIALDS  
TVL KSKYPG TLLLATGFDGDGAVFPLAF AIVNEENDNWHRFLSELRKILDENMPKLTIL  
SSGERPVVDGVEANFPAAFHGFLHYLTERFQREFQSSVLVDFWEAAHCLTVLEFKSKI  
NKIEQISPEASLWIQNKSPARWASSYFEGTRFGQLTANVITESL SNWVEDTSGLPIIQTM  
ECIHRHLINMLKERRETSLHWSNVLVPSAEKQMLAAIEQSR AHRVYRANEAEFEVMTCEG  
NVVVNIENCSCLCGRWQVYGLPCSHAVGALLSCEEDVYRYTESCFTVENYRRAYAETLEP  
ISDKVQWKENDSERDSENVIKTPKAMKGAPRKRVRRAEDRDRVRVHCGRCNQTGHFR T  
TCTAPM

>AtMUG4

MADGALITLDSDDILATEHVLAVGKEFPDVETCRRTLKDLAIALHFDLRIVKSDRSRFIA  
KCSKEGCPWRIHAAKCPGVQTFVRTLNSEHTCEGVRDLH HQQASVGGWARSVEARIRDN  
PQYKPKELQDIRDEHGVAVSYMQAWRGKERSMAALHGTYEEGYRFLPAYCEQIKLVNPG  
SFASVSALGPENCFQRLFIAYRACISGFFSSCRPLLELDRAHLK GKYLGA ILC AA AVDAD  
DGLFPLAIAIVDNESDENWSWFLSELRKL LGMNTDSMPKLTILSERQS AVVEAVETHFPT  
AFHGFC LRYVSENFRTDFKNTKLVNIFWSAVYALTPAEFETKSNEMIEISQDVVQWFELY  
LPHLWAVAYFQGVRYGHFGLGITEVLYNWAL ECHELPIIQMMEHIRHQISSWFDNRRELS  
MGWNSILVPSAERRITEAVADARCYQVLRANEVEFEIVSTERTNIVDIRTRDCSRRWQI  
YGLPCAHAAAAALISCGRNVHLFAEPCFTVSSYQQTYSQMIGEIPDRSLWKDEGE EAGGGV

ESLRIRPPKTRRRPPGRPKKKVVRVENLKRPKRIVQCGRCHLLGHSQKCKTQPI

>AtMUG5

MTTNKVIAICQSGGEFVTIKDGSLSYSGGDAFAIDIDQNTSMTDFKSELAENFGFLEAM  
TLKYFLPGNKKTLITISKDKDFIRMVNFSSDAGTVEIFVIPEEAAAKNLSVMPASRSSRT  
TASEGVVPAICAVGDGVEEDMANDFQIEMAMPDDSPLPCNFVLDQRHHTAIQQWENVIT  
GVDQRFNTFLEFRDALHKYSVAHGFAYKYKKNDSHRVSVKCKAQGCPWRITASRLSTTQL  
ICIKMNP RHTCERAVIKPGYRATRGWVRTILKEKLFKAFDPYKPKDIAEDIKKEYGIQLN  
YSQAWRAKEIAREQLQGSYKEAYSQPLICEKIKETNPGSIATFMTKEDSSFHRLFISFY  
ASISGFKQGSRPLFLDNAILNSKYQGVMLVATASDAEDGIFPVAFAIVDSETEENLWF  
LEQLKTALSESRIITFVADFQNLKNAIAQVFEKDAHAYCLGQLAEKLNVDLKGQFSHE  
ARRYMLNDFYSVAYATTPVGYLLALENIKSISPDAYNWVIESEPHHWANALFQGERYNKM  
NSNFGKDFYSWVSEAEHPITQMIDEFRAKMMQSIYTRQVKSREWVTTLTPSNEEKLQKE  
IELAQLLQVSSPEGSLFQVNGGESSVIVDINQCDCKTWRLTGLPCSHAIIVIGCIEK  
SPYEYCSTYLTVESHRLMYAESIQPVNMDRMMLDDPPEGLVCVTPPPTRRTPGRPKIKK  
VEPLDMMKRQLQCSKCKGLGHNKKTCKAT

>AtMUG6

MATKKVIAICQSGGEFVTNKDGSLSYSGGDAYAIDIDQDTCMSDFKSELAENFGFSWENM  
TLKYFLPGNKKTLITISKDKDFQRMVSFSADAPNVEIFVLPPEAEARNVSNMPASRSSRT  
TASEAVPVVVSAGDIVVGDMMIANDFQIEMGIMPEESSPLPCNFVLTDEKQHIKAAQQWE  
NAITGVDQRFNSFTEFRDALHKYSIAHGFYKYKKNDSHRVSVKCKAQGCPWRITASRLS  
TTQLICIKMNP RHTCERAVVKAGYRASRGWVGSIIKEKLFKAFDPYKPKDIAEDIKREYG  
IQLNYSQAWRAKEIAREQLQGSYKAYSQPLSFCKKIRETNPGSIAIFMTKEDSSFHRLF  
ISFYASISGFRQGCRRPLFLDTADLNSKYQGVMLVATAPDAEDGIFPVAFAVDAETEDN  
WVWVLEHLKLALADPRTITFVADFQNLKTALPLVFEKQHHHAYCLRHAEKLNMDLQAQ  
FSHEARRFILNDFYAAAYATQPDAYYRSLLENIKSISPDAYTWVIESEPLHWANALFEGER  
YNHMNSIFGLDFYSWVSEAEHELPIITQMIDELRAKLMQSIYTHQVQSREWIVSTLTPTNEE  
KLQKEIELARSLQVSAFNLSLFEVHGETINLVDINQCDCKVWRLTGLPCSHAVAVVEC  
IGKSPYEYCSRYFTSESYRLTYAESINPVPNTTMMILEEPPVEGVVSVTPPPTRLTPP  
GRPKSKQVEPLDMFKRQLQCSNCKGLGHNKKTCKAVS

>AtMUG7

MSGKRIVIAICMSGGEFQTEKGGSLSYKGGDAHAIDVDEQMKFIDFISEIGEMFNCDVRTV  
SLKYFLPDNKKTLISISNDKDLKRMKIFHENSNTADVLLPEEATPDISNMPASRSSRT  
LSEAIPPVPMDDMIDDTMGPEELPISISVSAPPAVTMEVMNRAEDAQIIINPSELMSI  
VEVPNPKGDILTKARTQQWQNTITGVGQRFKNVGEFREALRKYAIAANQFGFRYKKNDSHR  
VTVKCKAEGCPWRIHASRLSTTQLICIKMNP THTCEGAGGINGLQTSRSWVASIIKEK  
KVPFNYKPKDIVSDIKEEYGIQLNYFQAWRGKEIAREQLQGSYKDGKYLPLFCEKIMET  
NPGSLATFTTKEDSSFHRVVFVSHASVHGFLACRPLVFLDSMQLKSKYQGTLLAATSVD  
GDDEVFPLAFVAVDAETDDNWEWFLQLRSLSTPCYITFVADRQKNLQESIPKVFESF  
HAYCLRYLDELIDLKGPFSEIKRLIVDDFYSAAYAPRADSFERHVENIKGLSPEAYD  
WIVQKSQPDHWANAYFRGARYNHMTSHSGEPFFSWASDANDLPITQMVDIRGKIMGLIH  
VRRISANEANGNLTPSMEVKLEKESLRAQTVHVAPSADNNLFQVRGETYELVNMAECDCS  
CKGWQLTGLPCHHAVAVINYYGRNPYDYCSKYFTVAYYRSTYAQSINPVPLLEGEMCRES  
SGGSAVTVTPPPTRRPPGRPPKKTPAEEVMKRQLQCSRCKGLGHNKSTCKDYLLC

>AtMUG8

MKGKGLILICQSGGKFVTDGDMTYTGGEEAIDINHETTFDDFKLKLAKLLNLAYSSL  
SLKYFLPGNRRTLITMKQEKDMKMYDFHLSVTAEVFITGQYGFQSEAVLSPGTRSYNI  
AIGTETTPVAYGNVANVPIQVITGTPEENNLADINLSSRKVAPRVTSESSGLIDIPVTIS  
TIPVGPASTSKKFKTKGKNSLVSNITNLTPKSLKQTFIGSNPGSKSSPPTSLSVVCGVT  
TSSPRSVSRRRVMEEPIILLQDENVTDRRRSLRNRGEIRKPVIEITDDDDVDADEVSD  
EDSDDDVDADNVEDDDDKDYVDIETYPETEDLDYEREINYSISEANDGSVESLVASWK  
RCITGVGQGFESVVEFRDALQYAVACRFYRLRKNESNRACGVCLVGGCPWKIYASWVP  
SESVFRIKKFNRRHTCGGESWKSAPKKNWVVGIIKERLQENPNQKTKNIADSFQDFGI  
ELSYCTIRRGIIDEAKGLHTSFKEAYKYLPHFVNKVVANPGSMVNLVVGEDRRFQRLFL  
SFQSCIHGFTGCRPLFLDAIPFKSRYHEILLTASALDGGDCVLPVALALVDVETDETW

RWFLEQLKVALSSLRPLTFVSDREKGLVTSVLEIFENAHHGYSIHYLMEDFMRSLRGPFL  
GDGKPSLTYLLAAARADRLDGFVKYTEQIRRVSPRAYDWMQIESKHWACALFEGEPYS  
HITSDVAEYISKWIEEIQETSIVQKLVAFVKNIVELVNSSQEKSQWFSQLVPSKEESLV  
EECKKAGSLKVFCSDTLFEVHDGVSQLVDISNQTCSFCGWKPTGLPCQHAIIVLNTKGR  
NLYDYCSSFFTVDSYRLTYSVALGAVAIDLALVENEGSGKEEDEQVLPPLFSRVQGVKGR  
IKDRKRGRSVCCTKCGGVGHNKATCKDD

>O51

MANHDLVLGHGEDPELALGQNHDFGQDHGLGLGHSHELGLGHAHEHDLVLGQSHEHEHE  
HDHDLGLGNHDSQLVLAHDHHGHTSELALGHGHEDEPHSLDQDHDGLAMTENHVLTLT  
DAHQLDVDQNMDSLLEQAHELALQPAHDFSHGPLAVAPVVQSRKMVVSSEFQLVVGQEF  
PDVMSCRRAIRNTAIACHFIEIQTVKSDKTRFTAKCSADGCPWRIHAAKLPGVPTFSIRTI  
HDNHSCVGINHLGHQASVQVWANTVEERLRENPHCKPKEILEEIHKSHGITLSYKQAWR  
GKERIMAAVRSFEEGYRLPEYCRQVERTNPGSIARVYGNPDDNCFRRLFISFHASIYG  
FVNACRPLIGLDRITLKNKYLGTFLATGFDGDGALFPLAFGVVDEESDENWVWFLSELH  
ELLEKNTENMPRLTILSDRRKGIIDGVDFNPTAFHGHCMRSLSETFRKEFNNSVLVNL  
WEAANALTVIEFETKLEIEDTSPEAVCWIRRLPPRLWATAYFEGTRYGHLTANITESLN  
SWILDASGLPIIQMMECIRRQLMTWFNERREASMQWTTILVPAAEERRVQEAIERARGYQV  
ARANEAEFEVISPHEGTNIVDIRNRCCLCRGWQLYGVPCAAGVAALLSCRQNVHRYTESC  
FTVATYRKYSQTIHPIDKTLWNETSQDQGEENKVDVIINPPKSLRPPGRPRKKRIRA  
EDRGRIKRVVHCSRNCQTGFRTTCAAPI

>O52

MGSKQIVAVLQVGGEFKTDDDGQMSYSGGEAHAMHVKS DWTFKTFKHEISSTLNNLKLDS  
YVFKYFLPRNNKTLISISNDKDLKRMVEFHAESSETTYIYVMKKADNRVKTSAVVPAASAD  
HAVAATTPDGSKRQKICASWENAITGAGQVFEQPKFRDALHKYAIHRFHRYFVKNDSS  
RVTVECTAEGCPWRIHASKSPAKKDFMIKKVFGSHTCESESVKSHRLASQKWVASVIKEK  
LRDSPNYRPRDIANDLQREYGLSLNYSQAWRGKSIQKELYSSEEACNQLPWFCQRIVE  
TNPQSAATVEALEDSKFRFFVAFHASIQGFVHGCRPLLFLDVISVKNKHWKLLAATSVD  
GEGDMFPVALSVVDEESQENWHWFLEQLKASLPVSGELTFISNGKCGLLDEVSLIFPDSY  
HGYHVNFIIEFKAQLDDSWSEELKDTMVEHVKKAMYCKVDEFNQCIELIKVESDKLAE  
WLLLETKPEKWSDAFFKGSRLGQYTCNPETILQWVPSRYELSVVQLVDTIRCNLMEMMYT  
RREYSNSWTEPLTPSTNQKIQEEMGKALTHSVVCSTGNDGNNNVFEVCDGAVNVVNIIDTW  
DCTCRKWHVSGIPCSHAIIVFERTDHNPLDFCAKYFTTECYRLTYAMSINPIPDIVVAAP  
STDPSQGEALHQSPILTRRQVGRPKPKPADPRIAIKRAVRC SRCKGYGHNKATCKVPIAA

>O53

MGKGEIVAVLQVGGEFSTDADGLMSYSGGEAHAMLVKS DWTFSAFKHEISSTLNNIRVDQ  
FVFKYFLPKNKKTLISISNDKDLHRMVEFHAESSETTYIYVMKKKVDNRASIVVADSGTPV  
DTTAVVPTTQDGSKRQKICATWKNVITGVGQVFDGPKDFRDALHKYAIHAKFHRYFIKND  
SSRVTAECTGEDCPWRIHASKSPAKKQFMIKKISESHTCESETVKS HRLASQRWVASVIK  
EKLDRDSPNYRPRDIASDLQREYGLCLNYSQAWRGRSIAQKELHSTHDEVTSQLPWFCGRI  
MQTNPQSVATVVPMEBSKFRFLVAFHASLHGFEHGCRPLLFLDVISAKPNKQWLLTATS  
VDSEGDVFPVAFVAVVDEESSEHWHWFLEQLKSSVSASRAITFISNGENGLWDEVPLVFPD  
SHHGVCVDYLIEEFKTLQDDAWTEEARDVMVEHLKKAIIYACTVDEFNQYIELIKGESDKL  
AEWLLLEIKPERWSDAFFKGSRHGQYSCNFPSTIVEWIPTRYELSIQVLDVIRCKLMEMM  
YTRRESSNAWAELLTPAANQKLQEEVSKAHTLNVIPSESNENGNVFKVCDSDSVNVNIDA  
WECTCRKWHISGLPCMHAIAVIERIGHCPYDYCVKYFRTECYRLTYSMSINPIPDVMLPP  
AILSDQSQSPVTHATPIRTRRRVGRPKPKPADPRIAIKRAVRC SRCQGYGHNKATCKVPL  
ST

>O55

MEDDQILVEPDAAELQSLVDPTHELEQNLVEQGLVIGQEFVDVHACRRAVKDMAIAMH  
FELRVVKS DRSRFIAKCAREGCPWRVHVAKCHGVPTFTVRTLHGEHTCDGVRDLHHHQAT  
VGWVARVSEATLRDNPQYKPEILQDIREQHGVAVSYMQAWRGKERSMAAVHGTLEDGYR  
FLPAYCEQIVQTNPGSVAIYKGTGPDNSFQRLFVSFHASIHGFLNACRPLLEIDKADLKG  
KYLGTLLCASAVDAENMMFPLAFGIVDAESDENWMMWFFSELRKMLGVNTDKMPVLTILSE  
RQSQVVEAVEVNFPTAFHGFCLRYVSENFRDEFKNPKLLNIFWSAVYALTAAEFDSKVND

MVQVQDVMPWFQRFPPNLWAVSYFEGIRYGHFNLGITEILYNWAMECHEFPVQTVHEIK  
HQLTCWFVERQNLALSYSNLSLVPKSAEKLISEAIADSGCYQVLRANKVEFEIVSSERTNIV  
DTQA

>O56

MAEGLVVAICQYGGFTSGPNGNLIYKGGEAHAVDVTREMSLDNFKDEVSKVFHVEVSD  
VSLKYFLPNNRNLITISCDRDLQRMVDFASSAQVDVFLISRVENRSITQTGASTAKPG  
SNARGDKRKTPTSKNKASKNKKKTPSATGTAVQANANNVKQPRQVVTENDDNRVFPLEFG  
SDIAFANTAGAGSTAPDILNQQLALVDNTARESGLFDDSVNPPYVGEITTEPTQGLNN  
PIVFWDDIIKGVGQFDFNVKDFRAQLCKYAIKGFVYRFIKNETTRVTVKCVGEGCTWRL  
HASESSRNKKFVIKMTDEHTCGGSGEGQRRATRQWLTTVIKEKLHENPLFKPKDLVKE  
IYEEYGVMLTYSQWWRGREVAQKELYHAIRETYSHLPWYCERLLETNPGSIALLSPMVDT  
KFRFFVAFHSHLHGFTNGCRPLIFLDKVPKATNEYKLLVAAGVDADDGVFPVAFNVVE  
DENYESWVWFLMQLRYALQNHYPYNAMTFLSSGQKGLDAAVPQVFEESSHAFCLHHIME  
EFKGLRKGPSWQQRDGMVDFTRAAQACSIEDFNASIESIRNISTEADWIIASKPEH  
WSDAIFRGCYRDFHSSNIVDAFNWIPTKKEGSIVLMIDSLRMKIMEVIEARRESCKSWS  
GPLTPSMFKVQDEMSKAGKLTCLCSSETVFEVRGSAIYVNLANWECTCRRWQLSGLPC  
MHAVAVFNRVGRSFYDYCSKFFRIESYHLAYSGAIFPIPMDTVDFSAKANLIPPPKPT  
SDKPRRKRFPNPKIPTVVRLCSRCKQAGHNKATCEAIL

>Mt1

MDQKPEHDGNDLSEFPEQNHELVLSENNDLTVSESQGFNE SMDLAVVQNPMSIESANDM  
VYYSQYMLSSPHVQARTVDVIPTYELSVGQFEPNVKSCRRALRDTAIVLHFEMQTIK  
SDKTRFTAKCASEGCPRRRHAALPGVPTFTIRTIRESHTCGGISHLGHQQASVQWVASS  
VEQRLNENPNCKPKEILEEIHVRVHGITLSYKQAWRGKEHIMAAMRGSFEEGYRLLPQYCA  
HVKRTNPGSIAVSYGNPSDNCQRLFISFQASIYGLLNACRPLGLDRIYKSKYLGTL  
LATGFDGDGALFPLAFGVVDEENDNMMWFLSKLHNLEINTENMPRLTILSDRQQGIVD  
GVEANFPTAFHGFMRHLSDNFRKEFNNTMLVNLWEANALTIIEFEGKVMIEEISQD  
AAYWIRRIIPRLWATAYFEGQRFGQTTANIVEDLNSWILEASGLPIIQMLECIRRQLMTW  
LYERRETSMQWASVLPKSAERRVTEAIEHARTYQVLRANDAEEFVISHEGTNIIDIRNRC  
CLCRGWQLYGLPCAHAVALLSRQNFHRFTECFVATYRKYSETIHIPDKSLWKE  
SEGDAVSQALEVVIYPPKSLRPPGRPRKRVCAEDRGRVCRVHCSRNCQTFHFRITCA  
API

>Mt2

MDNLSLVLDDTSVAIAEQPLVIGQFDPVETCRRTLKDIAIAMHFDLRIVKSDRSRFAK  
CSKEGCPWRVHVAKCPGVPTFTIRTLQADHTCEGVRNLHHQQASVGVARSVESRIRDNP  
QVKPREILQDIRDQHGVAVSVMQAWRGKERSMAALHGTFFEGYRLLPAYCEQIRKTNPGS  
IASVGATGQENCFQRLFISYRASIYGFINACRPLELDRAHLKGYLGSILCAAADVADD  
ALFPLAIAVVDTESDENMMWFMSLRKLLGVNTDNMPRLTILSERQGMVEAVETHFSA  
SHGFCLRYVSENFDRDFTKNTKLVNIFWNAVYALTAAEFESKITEMIEVSQDVISWFQHP  
PFLWAVAYFDGVRYGHFTLGVTELLYNWALECHELPPVQMMYIRQQMTSWFNDRREVGM  
EWTSLVPSAEKRISEAIAADACHYQVLRANEVEFEIVSTERTNIVDIRSRECSRRWQLY  
GLPCAHAHAALISCGHNAHMAEPCFTVQSYRMAYSQMINPIPDKSQWREHGEGAE GGG  
ARVDIVIHPPKIRPPGRPKKVLRVENFKRPRVQCGRCHMLGHSQKCTMPI

>Mt3

MAATATKKVIAICQSRGEFVTNIDGSMYNGGDAYAIDIDQETSLSDFKSEIAETFNCNV  
STMNIKYFLPGNKKLITVSKDKDLQRMVDFLGDASTVDVFINVEVVARNTSNMPASRS  
SRTTVSEAVVPVPIPINVAIDAQEQIDQVEVDVANEAPAQSLCSGANDDKRQAAQWE  
NTITGVDQRFNSFSEFREALHKYSIAHGFAFYRYKKNDSHRVTVKCKSQGCPWRIYASKLS  
TTQLICIKKMRDHTCEGSAVKAGYRATRGWVGNIIKEKLKASPNYRPKDIADDIKREYG  
IQLNYSQAWRAKEIAREQLQGSYKEAYTQLPFFCEKIKETNPGSFATFTTKEDSSFHRLF  
VSFHASITGFRQACRPLIFLDSILLNSKYQGELLAATSVDGNDGIFPVAFVAVDAETEDN  
WHWFLQELKSALSTSEQITFVADFQNGLKKSLSEIFENCYHGYCLRHLADKLNKDLKQQL  
SHEARRFMVNDFYAAAYASKLEIFERSIENIKGISPEAYNWIQSEPEHWSNAFFNGARY  
NLMTSNFGQQFYSWVSEANELPITQ MIDVLRGNMMETISTREKSNQWITKLTSPKEEII  
QKETSARSLSQVLLSQGTTFEVCGQSVIEVDIDNWDSCCKGWKLTGLPCCHAIIVFECVG

RDLYDYCSRYLTVDNRYLTYTEPIHALPDIDKPVQVESAMEVVTVPPTKRPPGRPKSK  
QVESIDLKQRQLQCGKCKGLGHNRTCKLS

>Mt6

MDKRWGDWTLQIILVIWEKRGADGCFSEESFKLFCVYDRKDDAVTEFPDVKAFRNAIKE  
AAIAQHFELRIIKSDLIRYFAKCASEGCPWRIRAVKLPNASTFTIRSLEGHTTCGRNALN  
GHHQASVDWIVSFIEERLRDININYPKPDILHDIHKQYGITIPYKQAWRAKERGLAAIYGS  
SEEGFYLLPSFCEEIKKTNPGSVAEVFTTGADSRFQRLFISFYASIHGFVNGCLPIVALG  
GIQLKSKYLSTFLSATSFDADGGLFPLAFVVDVENDESWTWFLSELHNALVNTECMPQ  
IIFLSDGQKGVDAIRRKFPSSSHAFMRHLSENIGKEFKNSRLIHLWASAAYATTINAF  
REKMAEIEEVSPNASMMLQHFHPSQWALVYFEGTRYGHLSSNIEEFNKWILEAQELPIIQ  
VIERIQSKLKTFFDRLKSSSWCSVLTPSSERRMVEAINRASYQVLKSDVEFEVISA  
DRSDIVNIGSHSCSCRDWQLYGIPCSHAVAALISSRKDVYAYTAKCFTVASYRDTYAEVL  
HPVPGKLEWRTDESALDNDIAVVRPPKFRPPGRPEKKRICVEDHNRDKHTVHCSRNCQT  
GHYKTTCKAEMISSIEQF

>Cp1

MADPTLIVPDSSQTLIGQTLVIGQEPDVETCRRTLKDIAIALHFDLRIVKSDRSRFAIK  
CSKEGCPWRVHVAKCPGVPTFSIRTLHGEHTCEGVRNLHHQQASVGGVARSVEARIRDNP  
QYKPKELQDIRDQHGVAVSVMQAWRGKERSMAALHGTFFEGYRVLPAYCEQIRKSNPGS  
IASVFAAGPENCQRLFISYRASIYGFINACRPLELDRAHLKGGYLGTLCAAVDADD  
ALFPLAIAIVDVESEENMMWFMSLRKLLGVNTDSMPRLTILSERQRGIVEAVETHFPTA  
FHGFCLRYVSENFDRDFTKNTKLVNIFWNAVYALTAAEFEAKISEMVDISQDVLWPFQFP  
PQLWAVAYFEGVRYGHFALGVTELLYNWALCHELPPVQMMEHIRHQLAAWFDDRRDMGM  
RLNSILVPSAEKRISIAIADARCYQVLRANEVEFEIVSTERINIVDIRSRVCSRRWQLY  
GVPCAAAAALISCGNAHLFAEHCFTVASYRETYSQMINPIPKSLWKEQGGEGTEGGGA  
NLDITIHPPKTRPPGRPKKVLRVENLKRPKRIVQCGRCHLLGHSQKCKTMPI

>Cp3

MGTHGNPNLGEHANGDGLLEGYTKENHIAPQNPYIHQVKDDGEYLDREVDPAGVNNLNG  
DIQAYDNQLALSHHLALSENHEMNVGFGNQDVAENVVMEENQERSNVVTTESVEQAE  
LVLDPVQLQIRSLAQMENHEL TIGQEPDAKSCRRAVRNAAIALRFEVQTFKSDKTRFTA  
KCATEGCPWRIHAAKLPGLPTFSIRTIHDHHTCVGIAHLGHQQASVQWVADTLAEHIKQN  
PQCKPKEILEEIHVRHGITLSYKQAWRGKERIMAAIRGSFEEDYRLLPQYCDQVQKANPG  
SIALVYSNPNDGSFQHLFISFQASIYGFNLACRPLIGLDKTCLKSKDLGSILLATGFDGE  
GAVFPLAFVVDVEENDNWTWFLFELHKLLEINTDNMPKLTILSNRKRICVDGVEANFPT  
AFHGFCLHYLAESFHKEFNNSILLPLFWAAAAALTVIEFETKILEIQHISPSAALWIQNI  
PYTLWTTSHFEGK

>Cp4

MEHHTFVVGQEPDVKAFRNAIKEAAIAQHFELRIIKSDLIRYFAKCASEGCPWRIRAVK  
LPNAPTFTIRSLEGHTTCGKNAQNGHHQASVDWIVNFIEERLRDDINYPKPDILQDIHKH  
YGITIPYKQAWRAKERGLAAIYGSSEEGYCLLPSYCEHIKKTNPGSIAEVFTTGADNRFQ  
RLFVSFYGSIYGFHLGCLPIVCLGGIHLNSKYLGTLLSATSFDADGGMFPLAFGVVDVEN  
DDSWMWFLSELHRALEINAENMPQLTFLSDVQKGITDAVRRKFPTSSHAICMRHLSSEIG  
KEFKNSRLVNLWKAAYATTTIGFKERMAEIEYVSSEAAKWIQQFPPPRWALAYFEGTRY  
GHLSSNIEEFNRWILEARELPIIQVIERTHSKLIDEFERRMKSASWFSVLAPSAENRMV  
EASRASYQVLRSDVEFEVLSADRSDIVNIGMQSCSCRDWQLYGIPIYQEIFVYHRAD  
VYCPDYVTKELPSSLEWRLV

>Cp5

MAAKKIIAICQSGGDFVTNRDGSLSYTGDAYAIDIDQHTQLDAFKAE LAEMFACSIDTI  
SIKYFLPGNKKTLITISKDKDFNRMVNFSGDAGTVEIFVMSEEAARNVSNMPASRSSRT  
TVSEAAVLAVPDAVIDMPNVIDRVDMDIHNETPLACMSPMIEDRHHKAAQQWENTIT  
GVDQRFNSFSEFREALHKYSIAHGFAIRYKKNDSHRVTVKCKSQGCPWRIYASRLSTTQL  
ICIKRMSTRHTCEGVTVKAGYRATRGWVGSIIKEKLVSPNYKPKDIADDIKREYGIQLN  
YSQAWRAKEIAREQLQGSYKEAYSQLPFFCEKIKETNPGSITFTTKEDSSFHRLFVSFH  
ASISGFQQGCRPLFLDSTALNSKYQGVLLVATAPDAEDGIFPVAFAVVDVAETEDNWHWF  
LVELKSAVSESRRITFVADFQNLKRS LAEVFERCYHSYCLRH LAEKLNRDLKGGFSHEA

RRFMINDFYAAAYAPKLEGFQNSVENIKGISPEAYNWVVQSEPEHWANALFEGERYNHMT  
SNFGQVFYSWVSEAEHELPIQIMIDSLRGKMMETIYMRRVESNQWETTLTPSNEEKLQKET  
ALARSLQVLLSHGSTFEVRGDSVDIVDVHCECSCRWRLSGLPCCHAIIVFECIGKNPY  
EYCSRYLTTESYRLSYAESIYPVNVDRSLLDESSQMVVTVTPPTKRPPGRPKMQAES  
MDIIKRQLQCSKCKGLGHNKKTCKGS

>Cp6

MAGKKIIAICMSGGEFETEKDGSLLYKGGDAHAIDIDDQIKFNDFKMEVAEMFNYSNDTM  
SMKYFLPGNKKTLITISSDKDLKRMKIFHGNCDTADIYIIMEETVALDVSNMPPASRSSRT  
TLSEAMPQISRPLSNEDDVMDDSTQPEISLIVPLDVVEETNHIVADVDDAHLNIPAEISP  
MLPLASSNDEKHAKGAQQWQNTITGVGQRFSSVHEFRESLRKYAIAHQFAFRYKKNDSHR  
VTVKCKAEGCPWRIHASRLSTTQLICIKKMNPTHTCEGAVVTTGHQATRSWVASIIEKEL  
KVFPNYKPKDIVNDIKQEYGIQLNYFQAWRGKEIAKEQLQGSFKDAYNQLPLFCEKIMEL  
NPGSLATFTTKEDSSFHRLFVAFHASLYGFLQGCRPLLFLDSIALKSKYQGLVLLMGMME  
YFPVAFIVDTRDDNWALLKSALSTSCPLTFVADRQKGLRESIAEIFKGSFHAYCLRYL  
TEELIRDLKGQFSHEVKRLMVEDLYGAAAPSSSEGFQRCVESIKSISLEAYNWIMQNSQP  
EHWANAVFPGGRYNHMTSNFGELFYSWVSDAEHELPIQIMVDVIRARIMELIFSRRADSDQ  
WARRLTPSMEEKLEKENLKVRSLLQVLPAGNIFEVRGDSIEVVMDRWECSCKGWQVSGL  
PCCHAIIVGICIGRSAYDFCSRYFTIESYRLTYSESIHPICLERDLLNESSQAAVTVTP  
PPARRPPGRPTTKRIGSQEHKSYWAAEYGMRRGERIDMVGTLLVIFRKMVFLSOTWQVG  
MIIMWLFGEKAFVEK

>Cp7

MGKGLILICQSGGTFITNDDGSLSYTGGAEADINHETVFDLKFKLAEIWDLDYTSL  
SIKYFLPGNRRTLINLSNDRDLKRMDFHGESVTADVFTGRKGFQVAFDMHNRACGI  
KVAETVIATVASQPAMTMPVAMETETGTIDDTSKLAPVASRDNLVAAKTKTKSSTRLTAK  
SKRLTTKSSTRVTRTSKRSRAYKIDSDPGAACSVRNATADDCGHGLIIVDMSATPADTVK  
KRRRTAYWQSTPNGPTIVSITENVGETRKGTSRRRNVEDSDPSAISYYVEQQVETGPLME  
DSSGALVLANTGDASSKELIASWKDCITGVGHDFRWLFSVMHCKNMPLHIVLLSAVKSK  
YHEILLTASALDGGDVFPVAVTLVDIDNVGNWQWFLQLRSALSTSRITFVSDREKGL  
TKCVLEVFENAHGYSMFYLMENFMRDLKGFPHGDGRGSLPVNFLAAARAVRVDFAKMF  
ERIKRISPRAYDWMVTEPEHWADSAFKGERYSQITFNIAELYAKWTQEVWQLPIIQKIE  
KLISKMMELINDRRNISSDWSKLTSPKEEKVEEERRRACDLKVLFSDDLFEVHDTIN  
VVDIDKRDSCSLAWKVTGLPCRHAIVFSTGRSVYDYCSNYFTVDNFHVYTSKINLFL  
SVFNPSDEEKAGSEAEVLPSPISRPPSQEKKPNKSKGRIKRLVFCTRCKGAGHNKATC  
KEIEQGIIRLT

>Vv4

MANHDLILGNHNLGLGQNNQLVLGHNHNLGLGQNHTELELGGTHEHDLGLGSHDHELGL  
SHAHDHDLGLGQTVHQGADEHGYEHGNELAMDRKPEHDDHGLSLAEQNHELALSENNELA  
VSENQELDDNLDLAVDDHQEMGIESTSDMVQQHQLVVSTPVLQARTVVANPSYELVVGQE  
FPDVKSCRRALRDTAIALHFEMQTIKSDKTRFTAKCASDGCWPRIHAAKLPGVPTFTIRT  
IHEAHTCGGIAHLGHQASVQWVANSVEQRLRENPNYKPEILEEIHVRVHGITLSYKQAW  
RGKERIMAAAMRGSFEEGYRLLPQYCDQVKRTNPGSIASVYGNPTDNCFQRLFISFQASIY  
GFLNACRPLLGLDRTFLKSKYGLTLLFATGFDGDGALFPLAFGVVDEENDENWMMWFLSEL  
HNLLVNTENMPRLTILSDRQKGIVDGVEANFPTAFHGFCMRHLSDSFRKEFNNTMLVNL  
LWEAAHALTVIEFEAKILEIEEISQDAAYWIRRIIPRLWATAYFEGTRFGHLTANIVESL  
NTWILEASGLPIIQMMECIRRQLMTWFNERRETSMQWTSILVPSAERRVAEALERARTYQ  
VLRANAEFEVISHEGTVNIVDIRNRCCLCRGWQLYGLPCAHAHAALLSCRQNVHRFTESC  
FTVATYRKTYSTIHPIDKTLWKELSEGDPNGSKSVEIMINPPKSLRPPGRPKKRVR  
EDRGRVVRVHCSRNCQTGHFRTTCAAPI

>Vv5

MAGKKIIAICQSGGEFEADKDGSLSYRGGDAHAIDIDDQMKFNEFKMEVAEMFNCSISTM  
SIKYFLPKNKKTLITISNDKDLKRMKIFHVDSVTVDIYVMTEEVVALDVSNMPPASRSSRT  
TLSEAVVPVDAPLDMKDDMVDVDDTTPDVSLGLPLDVVDDTTHVDVDAQITMPNEISVPLP  
LSISNEEKHVAAAQQWQNTITGVGQRFSGVHEFREALRKYAIAHQFAFRYKKNDSHRVTV  
CKAEGCPWRIHASRLSTTQLICIKKMNATHTCEGAVVTTGYQATRSWVASIIMDKLVF

PNYKPKDIVNDIKQEYGIQLNYFQAWRGKEIAKEQLQGSYKEAYSQLPFFCEKIMETNPG  
SFATFTTKEDSSFHRLFVSFHASLYGFQQGCRPLLFLDSISLKSXYQGTLLAATAADGDD  
GVFPVAFSVVDAETDDNWHWFLLQLKSALPTS SRPITFVADREKGLRESIAEIFQGSFHGY  
CLRYL TEQLLKDLKGQFSHEVKRLMVEFYAAAYAPRPESFQRCLLETIKSISLEAYNWL I  
QSEPMNWANAFFQSARYNHMASNFGELFYSWASEAHEL PITQMV D VIRGKIMELFFTRRT  
DSNQWMLRTPSMEEKLEKETVKVRPLQVLLSGGNTFEVRGDTIEVVDIDHWDCSCKGWQ  
LTGLPCCHAIAVISICIGQSPYEYCSRYFTTESYRLTYSESVHPIPNVDRPMEKDSLVAV  
TVTPPPTRPPGRPTTKRFGSQEVVQRQLQCSRCKGVGHNKSTCKELL

>Vv6

MSNNDLLLGNHDHLSLGHNQPLGLRHNHNLVLSHELVLGHAHDELALGQNHHEMALRH  
AHGHHNHENGFDVRDENGLDMSQNHDPDQHHNDVDNHDNELGLTVQNHALSLENHEL  
ALVENHDLDENIELTVSQSGEISIVDASGMTAQHSQLLVSSPVLQSRTVVPAPNHEL VVG  
QEFSDVQSCRRALRDTAIALHFEIQTVKSDKTRFTAKCASDGC PWRIHCAKLPGVPTFTI  
RTIHESHTCGGITHLGHQASVQWVASSVEQSLKENPHYKPKELLEE IHRVHGITLSYKQ  
AWRGKERIMAAVRGSFE EGYRLLPQYCDQIRRTNPESIALVYANPMDNSFHRLFVSFQAS  
YGF L NACRPLIGLDRTLLKSKYL GTLLFATGFDGDGALFPLAFGVVDEENDNMMWFLS  
ELHNLLEINTENMPRLTILSDRQKVIVEGVEANFPTAFHGF CMRHLSDSFRKEFNNTLLV  
NLLWEAAQVLTVIEFEAKILEIEEISQEAAYWIRRI PRLWATAYFEGTRFGHLTANVVE  
SLNTWILEASGLPIIQMMECIRRQLMTWFNERRETSMQWTSILVPSAERRVSEALERART  
YQVLRANEAEFEVISHGNTIVDIRNRCCLCRGWQLHGLPCAHAVALLSQRQNVHRYTE  
SCFTVATYRKAYSQTIHPDKTLWKEMADGSDQGGDNAVETIINPPKSLRPQGRPRKRR  
VRAEDRGRVKRVVHCSRNCQTGHFRTTCAAPI

>Vv9

MADHALVSDASLDHSLVSDASVDHSLVIGQEFDPVETCRRTLKDIAIALHF DL RIVKS  
DRSRFIAKCSKEGCPWRVHVAKCPGVPTFSIRTLHGVTCEGVRNCHHQASIGWVARSV  
EQVRDNPQYKPKELQDIRDQHGVAVS YMQAWRGKERSMAALHGT FEEGYRLLPGYCEQ  
IRKTNPGS IASVFATGQENCFQRLFISFRASIYGFINACRPLLELDKAHLKGKYL GTLLC  
AAAVDADDALFPLAIAIVDTESDENMMWFMESELKLLGVNTDNMPRLTILSERQSGIVEA  
VETHFPSASHGFCLRFISENFRDFTKNTKLVNIFWNAVYALTAVEFESKITEMIEISQDV  
IPWFKGFPPLWAVAYFDGVR YGHFSLGVTELLYKWALECHELPIVQMMEHIRLQLTSWF  
DERRNMGMRWTSILVPSAEKRILEAIADAHCYQVLRANEIEFEIVSTERTNIVDIRSRVC  
SCRWRQLYGLPCAHAVALLSISCGQNAHLFAEPCFTVASYRDTYSQMINPVPDKRHWKEPG  
EGAEGGAKVDITIRPPKTRPPGRPKKKVLRVENFKRPKRVVQCGRCHMLGHSQKCTM  
QM

>Vv10

MGDYNFVVGQEFADVKAFRNAIKEAAIAQH FELRIIKSDLIRYFAKCATEGCPWRIRAVK  
LPNAPTFTIRSLEGTHTCGKNAQNGHHQASVDWIVSFIEERL RDNINYKPKDILHDIHKQ  
YGITIPYKQAWRAKERGLAAIYGSSEEGYCLLPAYCEEIKRANPGSVAEVFTSGADNRFQ  
RLFVSFYASIYGF L NGCLPIVGLGGIQLKSKYL GTLLSATSFDADGGLFPLAFGVVDAEN  
DESMMWFLSELRKALEMNTENVPQLTFLSDGQKGIQDAVKRKFPTSSHAFCMRHLS ESIG  
KEFKNSRLVHLLWKAAYATTTIAFKEKMAEIEEVSSEAAKWIQQFPTSRWALVYFEGTRY  
GHLSSNIEEFNKWILEARELPIIQVIEQIHSKLMAEFEERLKSNSWFSVLAPSADKRM  
EAI GRASTYQVLRSDVEVEFELSAERSDIVNIGTCCSCRDWQLYGIPCSHAVAALLSCR  
KDVAFTTEKCF TVASYRAAYSEEIRPIPKIEWRRTVEAPVDDDT PVRPPKFRPPGR  
EKKRICVEDLNREKHTVHCSRNCQTGHYKTTCKADIMKSIEQF

>Vv11

MAAKKVIAICQSGGEFVTNKDGSLSYNGGEAYAIDVDQQTQLSDFKLEVAEMFNCSIDTM  
SIKYFLPDNKKTLITISKDKDLKRMVKFLGDSVTVDIFIMTEEAVPRNQSIMPASRLMLF  
RMLTFRVQFQAQLQSSRTTVSEAVVPAVAPVDAVDMTHAIDKVDMDMANYTHSDNAPVI  
SNDDKHQKAAQQWENTITGVDQRFN SFNEFREALHKYSIAHGFAYKYKKNDSHRVTVKCK  
SQGCPWRIYASRLSTTQLICIKMHTTHTCEGAIVKAGYRATR GVVGTIIKEKLVSPNY  
KPKDIADDIKREYGIQLNYSQAWRAKEIAREQLQGSYKEAYSQLPFFCEKIKETNPGSFA  
TFETKEDSSFHRLFISFHAAISGFQQGCRPLLFLDSTPLNSKYQGMMLTATAADGDDGVF  
PVAFVAVDAETDDNWSWFLLELKSAVSTARPITFVADFQGLKKS LAEIFDNGYHSYCLR

YLTEKLNKDLKGQFSHEARRFMINDFYAAAYASRLETFQRCTENIKGISPEAYNWVIQSE  
PDHWSNAFFGGARYSHMASNFGQLFYNWVSEANDLPITQMVDVLRGKMMELIYKRRVDSS  
QWITKLTSPSKEEKLKDTSTARSLQVLLSHGSTFEVRGESIDIVDIDHWDSCSKDWQLSG  
LPCCHAIAVFEWIGRNPYDYCSRYFTVESYRLTYAESIHPVNPVDRPVKTESTQVGIIVT  
PPPTKRPPGRPKMKQAGSVETIKRQLQCSKCKGLGHNKKTCKDF

>Vv12

MMNLEYQSLSIKYFLPGNRKTLITLSTDKDLKRMIGFHGDSVTADVFMGREGFDSHALN  
IHACRESGIKLAETVNHIAVSMTPAVAPQPFIAIPVSLGVMPSGAFPIDPVTVTVTDVAVP  
DTTTTVAHAAVTVSPVAPATFLVSTVADSLTAVDATAQSLNGISTTANPFAAFTITGDPS  
AAAPTPTVPVIVAAIDATAHGSVILDITSTPADTVKKRRRTASWKFGANSPTIVSVTDDV  
GGKKRTASRKKNSRQNTVPVADNVEQQQENGPWKDDFNGSSSLVASDDVPLEKLVASWK  
DGITGVGQEFKSVYEFREALQKYAIAHRFVYRLKKNDTNRASGRCVAEGCSWRIHASWVP  
AAQSFRICKMTKSHTCGGQSWKSAHPTKNWLVSIIKDRLQDTPHHKPKDIAKCIFQDFGI  
ELNYTQVWRGIEDAREQLQGSYKEAYNLLPWFCEKLVETNPGSVAKLLINDDKRFERLHV  
SFHASLHGFMQGRPLLFLDATSLSKSKYQEILLIATAVDGNEGFFPVAFAIVDVEDDNDW  
LWFLLEQLKSAISTLQPMFTVSDREKGLKKSVEVFENAHHGYSIYYLMENFKKNLKGPFH  
GDGRGSLPINFLAATHAIRLDGFKKSTEQIKRVSSKAYNWMQIEPECWATVSFEGEHYN  
QITVDVIHAYINLIEEVRELPITQKIEALICMIMESINTCQTDSSWSSQLTPSKEEKLQ  
DEI IKARSLKVL FSTDTLFEVHDDSINVVNIDSWDCSCLQWKATGLPCCHAIAVFNCTGR  
SVYDYCSRYFTLNSFRLTYSESINPLPSIIKSLDNEEAALHTLNVLPCTLRPLSQQRK  
RVKTEVMRRVAVSCTRCKLAGHNKATCKATL

>Zm1

MANHELVLGHGQDAELALGPNHHDGFGSHDLDLGGHAHDHELVLGQSHEHDHELVLGQSH  
ERDHELVLGQSHEHDELVLGHHHDDHQLVLGHDHHDHDELVLSEHDLTAETHHLG  
VDHNLQDLSLEQAHELALQPHDFSQGPLAVAPVVQSRMVMVSPFQLAVGQEFPDVMSR  
RAIRSTAIACHFEIQTVKSDKTRFTAKCAAEGCPWRIHAAKLAGVPTFSIRTIDHSHSCV  
GISHLGHQASVQVWATTVEERLRENQCKPKEILEEIHKAHGITLSYKQAWRGKERIMA  
AVRGSFEEGYRLLPEYCRQVERTNPGSIARVYGNPDDSCFRRLFISFNASIYGFINACRP  
LIGLDRTLLKNKYLGTFLATGFDGDLFPLAFGVVDEETDENWVWFLSELHELLEKNT  
ENMPRLTILSDRQGITDGVFNFPTAFHGYCMRHVSETFKKEFSNPVNLWEEAAHAL  
TVIEFETKLEIEDMSQEAAVWIRHLPRLWATAYFEGTRYGHLTASITESLSSWILDAA  
GLPVTQMMECIRRQLMTWFNERREASMWSTILVPAEERRVQEAIERARGYQVARANAE  
FEVVAHEGNTIVDIRNRCLCRGWQLYGVPCAAGVAALLSCRQNVHRYAESCFVATYR  
KTYSQTIHPIDKTLWSETADQDQGDGEVKAEMVINPPKSLRPPGRPRKRVRAEDRGR  
VKRVVHCSRNCQTGHFRTTCAVPI

>Zm2

MANHELVLGHGQDAELALGPNHHDGQDHLGLGSHDLGLGGHAHDHELVLGQSHEHDH  
QLVLGHHHDDHQLVLGHDDHHHHVHAGELVLRQGHGDSETLEVQGHHDDELVLSES  
HELTLAETHHLGVDQNFQDLSLEQAHELALQPHDLSQAPLAVAPVVQSRMVMVSPFQLA  
VGQFPDQVSCRRAIRNTAIACHFEIQTVKSDKSRFTAKCAAESCPWRIHAAKLPVPTF  
SIRTIDHNSCVGINHLGHQASVQVWANTVEERLRENPEYKPEILEEIHKAHGITLSY  
KQAWRGKERIMAAVRGSFEEGYRLLPEYCRQVERTNPGSIARVYGNPDDNCFRRLFISFS  
ASIFGFVNACRPLIGLDRTLLKNKYLGTFLATGFDGDLFPLAFGVVDEETDENWVWFL  
LSELHELLEKNTENMPRLTILSDRRKGITDGVFNFPTAFHGYCMRHVSEAFKKEFNPNV  
LANLLWEEAAHALTVIEFETKLEIEDASPEAVVWIRHLPRLWATAYFEGTRYGHLTANI  
AESLNSWILDASGLPIVQMMECIRRQLMTWFNERREASMWNTILVPAEERRVQEAIERA  
RGYQVARANAEFEVISAHEGNTIVDIRNRCLCRGWQLYGVPCAAGVAALLSCRQNVHR  
YTESCFVATYRKTYSQTIHPIDRTLWDETADQDQGVKEMIINPPKSLRPAAPRKRVR  
RAEDRGRVVRVHCSRNCQTGHFRTTCAAPI

>Zm3

MEDNQILVQSEHNLIPIGSRTLVIGQEFADVDTCRAVKDMAIALHYELRVVKSDRSRFIA  
KCSKEGCPWRVHIAKCPGVPTFTVRTLHGEHKCEGVLNLHHQQATVGGWARSVEARLRDN  
PQIKPKEILQDIREQHGVAVSYMQAWRGKERSMAAVNGTLEDGYRLLPAYCEQIVKTNPG  
SVATYRIGIPGNAFQRLFVFSFRASIYGLNGCRPLLEIDKADLKGKYLGTLLCASAIDAD



HMMFPLAFGVVDCESDDNWNWFISELRKMLGVNTDKMPVLTIVSERKRQVVAAGSNFPT  
AFHGFCLRHVSENFDEFKNTKLLNIFWSAVYAL TASEFDAKVQDVMPWLQRFPPNLWAF  
SYFQGIRYGHFSLGITEILYNLSLDCHELPIVQTEIHIRHQLACWFAERQNLAQSYNSVL  
VPSAEKVI LEAIHDSQCYQVLRANKVEFEIVSSERTNIVDTQARFCSCRRWQIYGIPCAH  
AAAAALLSCGEDPRLYADDCFSVMKYRETYSQPIYPIDRSHWNDSPPWSQGA VSKADVLL  
GPPNIRRPPGRPKMKILKIESMKRPKRIVQCGRCHLLGHSQKCCSLRS

>Zm4

MEGNQILVQSEQSLIPGVQTLVIGQEFADVDTCRRAVKDMAIALHYELRVVKS DRSRFIA  
KCSKEGCPWRVHIAKCPGVPTFTVRTLHGDHKCEGVLNLHHQQATVGVVARSVEARLRDN  
PQIKPKEILQDIREQHGVAVS YMQAWRGKERSMAAVNGTLEDGYRLLPAYCEQIVKTNPG  
SVATYGGIGPGNAFQRLVFSFHASIYGFLNGCRP LLEIDKADLKGKYLGTLLCASAIDAD  
HMMFPLAFGVVDS EDDNWNWFISELRKMLGVNTDKMPVLTILSERKRQVVKAVGSNFPT  
AFHGFCLRYVSEFLDEFKNTKLLNLFWSAVYAL TASEFDAKVNEMMRVQDVMPWLQRF  
PNLWAVSCFQGIRYGHFSLGITEILYNLSLDCHELPIVQAEIHIRHQLTCWFAERQNLAQ  
SYNSVLVPSAEKLVSEAIHDSQCYQVLRANKVEFEIVSSERTNIVDTEARSCSCRRWQIY  
GIPCAHATAALLSCGEDPRFYAHDCFSVMKYRETYSQPIHPIDRSHWSNSSPGLQGVAS  
KADVMMLSPPNIRRPPGRPKMKILKIESMKRPKRIVQCGRCHLVGHSQKCCSLRS CDSYP  
H

>Zm5

MAAAAATPPWASLGPDTCCFFHYCCHHIFEIRVFQLEFGSDVAFATPAGGASTAPDILDQ  
NLALVDTAHREPIGHFDDSGDSYVSGSEITVDPQHGLDNPVMFWDDIIKGVGQEFDNV KDF  
RAQLCKYATIGKGFAYRFIKNETTRVTVKCVAEGCTWRMHASESSRNKKFVIKKMTDEHTC  
GGNGEGQRRATRQWLTTVIKEKLDHNPMLKPKDLVKEIYEYQYGVTLTYSQVWRGKEVAQ  
KELYHAIRETYSHLPWYCERLTESNPGSIALLSPMVDTKFRFFVAFHASLHGFANGCRP  
LLFLDKVPLKATNEYKLLVAAAVDADDVFPVAFSVVEDENYESWVWFLMQLKFPVQNH  
YAYNAMTFLSSGQKGLDAAVSQVFEDSHHAFCLHHIMEEFKGE LKRGPWSQQIREGMIED  
FTRAAQACSIEDFNFSIESIRNISTEAAEWIASKPEHWSDAIFRGC RYDHFSSNIVDAF  
NNWIPTKKEGSIVLMVDSLRTKIMEIIE TRREACKAWSGPLTPSMEFKAQE EVTKAGKMT  
VLCSESTVFEVRGNAIFVVNLANWECTCRRWQLSGLPCLHAVAVFNRIGRSFYDYCSKFF  
RIESYHMTYSGTIFPIPMDTVDF SAGANLIPPPKPRTS DKPRRKRFPNPKIPTVIRLCS  
RCKQAGHNKATCEAIL

>Zm6

MGKGQILAVLQIGGEFNTDEDGHMSYSGGEAHAMHVQSDWTFSAFKQEISSTLNNLKL DQ  
FAFKYFLPKNDKTLISISNDKDLRRMVEFHAESDSTYIYVMKKADNRSKNIVAVLDTPTD  
AFAIVPTTQDQSKRQKVCASWKNVITGVGQVFEGPKDFRDALHKYAI AHRFHRYFIKND  
SRVTAECTGEGCPWRIHASKSPAKKEFMVKKISESHTCESETVKS NRLASQRWVASVIKE  
KLRDSPNYRPRDIANDLQREYGLCLNYSQAWRGRSIAQKELYSTHEEACSQLPWF CERIV  
ETNPGSVATVVALEDSKFRFFVAFHASLHGFEGCRPLL FLEAITAKPNKHKKLAAASV  
DGEQDVFPVAFGVVDESRENWHWFLEQLKSSLGTSRTITFISNGEHLWDVLSVVFQEC  
HHGYCVESLIEEFKMQLD DAWTEELKDSMVEHLKKAINSCTADEFNQYIELIKSGSDKLA  
DWLLEIKPERWSDAFFKGSRHGQYSCNIFGTVSEWIPTRYELSVVQLVDTIRCKLMEMMY  
TRRESSNAWTEVLTPAANQKLQEEVNKAHTLNVLPAENGENGNVFKVCDSDSVNVNLDTW  
ECTCQRWHISGLPCMHVIAVLERTGQYAYDYCVKYFTTECYRLTYSLSINPIPDVIVPPT  
LIDLAQSPATYPCPLRTRRRVGRPEKPADPRIAIKRAVRC SRCKGYGHNKATCKVPISS  
FST

>Zm8

MADGAIVVAICQYGGFSTSGPSGNLIYRGGEAHAVDVT HDSSLESFKDEL SKV FHV DVT  
MSLKYFLPNMKT LITISCDRDLQRMVGF TANAHDVDFLISRQENRSTITHSGATSGSV  
ASGDKRRRPTPKNKVIRSSK PATSAACNALQAITDNVRQPI SVITENEDNRVFLQLEFGND  
ITFTTTAGGASFTSDILDQQLVLVDNIPKEAVSLFDDAFNPYVSSEIMHEPPQEPNPI  
VLWDDIIKGVGQEFDNV KDFRAQLCKYAI GKGFVYRFIKNETTRVTVKCGAEGGCTWR LH  
ASESSRNKFFIIKRLTDEHTCGGSGEGQRRATRQWLT TIIKEKLDHNP KFKPKELVKEL  
FEEYGVTLTYSQVWRGKEVAEKEL YHAVRETRDQLPWYCQRLEETNPGSISVLSVPLDMK  
TRRFVVALHACLHGFINGCRPLLFLDKVPLKATNEYKLLVAAAVDADDGVFPLAFNVVED

ENYDSWGWFLMHLKIALQTHNYPCNGMTFLSNGQMGLDAAVSHVFEDEGEHAFCLHHIEE  
FKGELRKGPSWQQIREGMVEDFTRAAQACSIEDFNASIESIRNISSEAADWIIASKPEHW  
SDAIFRGRFYDHFSLNIVDAFDNWIPAKKESIVLMVDSLRIKIKEVIESRLEACKVWQG  
PLTPTMEYKVQDEMLKAGKMTVLCSSTVFEVRGNAVFFVNIIGNWECTCRRWQLSGLPCM  
HAIAVFNRLGRFCFYDQPKFFRIESYHLTYSGIIFFIPDLDSVDFSAGANLLPLPPKRRT  
SDKPRRKRSNPNKISTLTRLC SRCKQTGHNKATCEVQF

>Bd1

MANHELVLGHGQDAAELALGQNHDFGQDHHGLVLGHSHDLGLGHPQDHFVLSHDHGHE  
HDHALVLRHHHHHDSQLVLGHDHTGDLALGQGHDESLDGEHHDLGLSENHELALAEPL  
PLVDDNLDHHTLEQAHELALPAHDFSQGPLAVAPVVQSRMMVVSTEFQLAVGQEFDP  
VMSCRRAIRDTAIACHFIEIQTVKSDKTRFTAKCAAEGCPWRIHAAKLPVPTFSIRTILD  
NHSCVGINHLGHQASVQVWASTVEERLRENPHCKPKEILEEIHKSHGITLSYKQAWRGK  
ERIMATVRGSFEEGYRLLPEYCRQIERTNPGSIARIYGNPDDNCFRRLFISFYASIYGFV  
NACRPLIGLDKTTLNKNYLGTFLATAFDGDGALFPLAFGVVDDENDENWIWFLSELHEL  
LEKNTENMPRLTILSDRRKGIVDGVDINFPTAFHGYCMRHLSETFRKEFNNSVLVNLLWE  
AASVLTATDFETKLEIEDTSQEAVAWIREIPPRLWATAFFDGPRYQQLTANITESLNSW  
ILDASSLPINQMECLRRQLMTWFNERREASMQWTTILVPTAERRVQEAIERAQNYRVAR  
ASEAEFEVISPHEGTNVVDIRNRVCLCRGWQLYGMPCAHGVAALLSCRQNVHRYTESFFT  
IAMYRKYTSQTIHPDKTHWNETPEDQGEAEQGRLEVIINPPKSLRPPGRPRKKRVRAE  
DLGRVKRVVHCSRNCQTGHFRITTCVAPI

>Bd2

MVLGNDHHGHTCDLSLRQGHDKDSLVRREGQDGEHHGFGLLENHELVLAEPHSLVDDNLD  
DELSLEQTHEFALQPAHDLSQLLAVAPRMMAFSTEFQLVAGQEFPNVMYCRRAIRNTAI  
ACHFEIQMVKSDNTSFTAKCTAEGCPWHIHAAKLPVPTFSIRTILDNHSCVGINHLGHQ  
QASVQLVASTVGERLPENPHCKPKEILEEIHKSNEITLPHYKQDWIGKERSIAAVRGSFEE  
GYRLLPEYCRQVERTNPGSIGRVYGNPDDNRFRLFISFYASIYGFVNACCPLIGLDKVT  
LKNKYVGTFLIATAFDGDGALFPLAFGVVDEETDENWIWFLSELHELLEKNTLSMPRLTI  
LSDRSKGIIDGVDINFPAAFHGYCMHHLSETFRKEFNNSVPVDLLWEANVLTATDFETK  
LLEIEDISQEAVCWIKGIRPCLWATAFFDGTRYGHLTANVTESLNSWILDASSLPINQMM  
ECLRCQLMTWFKERHEASMQWATLVPPTAERRLQEAIERARGYQVTRANETEFVISPHE  
GTNVVDVRNRCCLRGWQLYGVPCAHGVAALVSCRQNVHRYTERTYFTIGTYRKYTSQTVH  
PIPDKTLWNKMSNQGEAEESKLEVIINPPKSRRSPGRPRKKRVHAEDHGQVKLVHCSRC  
SQMGHFRITTCPAAL

>Bd3

MEGNKVTVEPADGQVMVEREDDQVSVEL EEDQVLVETDDQALVEPEQDLALREQFLVIG  
QEFANVDACRRAIKDMAIALHFQLRVVKSRSRFAKCSSEGCPWRVHVAKCHGVPTFTV  
RTLHGEHTCEGVQDLHHQATVNWVARSVEARLRDNPQIKPKEILQDIRDQHGVAVSVMQ  
AWRGKERSMAAVHGTLEDGYRFLPSYCEQIVKTNPGSVAVYKSGSPENSFQRLFVFSFRAS  
IYGLFNGCRPLLEIDKSDLKGYLGTLLCASAVDADHMMFPVAFGVVDESEDENMMWFVS  
ELRKMLGVNTDKMPVLTLSERQTVVEAVEVNFPTAFHGFCLRYVSENFFREEFKSPKLL  
NLFWSAVYALTTAEFDSKVKMMHIQDVMPWFEHFPPNLWAVAYFDGIRYGHFNLGITEI  
LYNWALECHELPLVQTVVEYIRNQLTCWFTERDKLALSLNSVLVPSAEKLISEAIADSRCY  
QVLRANKVEFEIVSSERTNIVDTQTRFCSCRRWQIYGIPCAHAVAALLSCGEDPRLYAHE  
CFSVTKYLETYSQRIPDRSQWSSSSGLRGPYKSDAILRPPRIRPPGRPKMKILK  
MESLKRPKRIVQCGRCHLLGHSQKCSL

>Bd4

MVALVGDGRRGNRTLMGKGQIVAVLQLGGFETTDADGHMSYSGGEAHAMLVKSDWTFDAF  
KHEISSTLNNLKIDQFLFKYFLPKNNKTLISISNDKDLLRMVEFHAESSETTYIYVMKKVD  
NRAKGVVADSGTPVETTAVVPTTEDGSKRQKVCATWKNVITGVGQVFEQPKDFRDALHKY  
AIAHRFHRYFVKNDSSRVTAECTGEDCPWRIHASKSPAKQDFMIKKISESHTCESETVKS  
HRLASQRWVASVIKEKLRDSPNYRPRDIANDLQQEYGLCLNYSQAWRGRSIAQKQLYSSH  
DEACNQLPWFCERIKETNPGSVATVVTMEDSKFCFFVAFHASLHGFEHGCRPLIFLDAVS  
AKPNKQWKL LAATSVDGEGDVPVAFVTVDEESRENWHWFLEQLKSSLLASRDITFISNG  
ENGLWDEVPLVPFESHGVCVDFLIEEFKMQLEDAWIEEVRDAMVELCKKAIYSCTADEF

NQHIEEIRSESDKLAEWLLEIKPERWSDAFFKGSRHGQYSSNIYNTIADWIPTRYELSVV  
QLVDTIRCKLMELMYTRRESSNEWTEVLTPAANQKLQEEVSKSHTLNVPTESDGGQGSVF  
KVCDDSVNVVNIDTCDCTCRKWHVSGLPCMHAVAVFERTGQYAYDYCLKYFTTECYRLTY  
SISINPIPDVILPPVTLTNPQSQPATYPCPIRTRRRVGRPKEKPADPRITIKRAVRCSRC  
KGYGHNKATCKIPITEALPLAELSDVQN

>Bd5

MGSRQIVAVLQLGGVFTTDDGGMTYSGGEAHAMHVKSGWTFKAFKNEISSTLNNLKLDS  
YAFKYFLPRNNKTLISISNDKDLKRMVEFHAESETTYIYVIKKVENRVKSSVADSGAPAD  
LAVIATTPDGSKRQKICASWENAITGAGQVFEQPKFRDALHKYAIARRFHYRFIKNDST  
RVTVECTDEGCPWRHASKSPSKEFMIKKVVGSHTCASETVNSHRLASQKWVASVIKEK  
LRDSPNYRPRDIANDLQREYGLCLKYSQAWRGKLIARKELYSPHEEACNHLPWFRDRILA  
TNPGLATVVTLEDSEKFRFFVAFHASLHGFEHGCRPLIFLDVIVKPNKHKKLAATSVD  
GEGDVFPVAFSVVDECEQENWHWFLEQLKASLPVPREITFISNGKSDLWDDVSLIFPDSY  
HGYNINSFIEEFKTLDDGWSEEVKDTMVEHLKEAVYSCTVDEFNHYIELIKAESDKLAE  
WLMETKPERWSDAFFKGSRLGQYTSNISETIVDWMPSRYELPVVQLLDTIRCNLMEMIYT  
RRESSNAWSEVLTSPANQKIQEEMSKVLSLSVVCSTENHGNNNVFEVCDGSVYIVNIDTW  
ECTCRKWHVSGIPCSHALAVFERTEQNPLDYCAKYFTTECYRMTYAMSINPIPDVMVPSA  
STDPSQSGGLVPCPILTRRQVGRPKEKPADPRIAIKRAVRCRCKGYGHNKATCKVPITA

>Bd6

MAEGGIVVAICQYGGFETSGPNGLIYKGGEAHAVDVSREMSLDSFKDEVSKVFHVDVDM  
SFKYFLPNNKTLITISCDRLQRMVEFTASAAQADVVISRVENRASKSSKTPDASGA  
AVQASTVDVNEPRVLTLDNYNEYRNLIIAHLMYIIVPLVLLPISCRDFLEFGREAA  
FDTAAGATISSAPDTLNQEKALVDNTQREPIGFDDAINPYDGEIIDIPPQELNNNPTV  
FWDIIKGVGQEFDNVKDFRAQLCKYAIKGFVYRFIKNETTRVTVKCVGDGCTWRLLHAS  
ESSRNKFKVKKMTDEHTCGGGGGEGQRRATRQWLTIIKEKLHANSLLKPKDLVKEIHE  
EYGVLLTYSQVWRGREVAQKEMFHVMTETLGHLPWYRDKLLQTNPGSILDLPGNRRFFIA  
FHASLHGFTNGCRPLLFLDKVPLKATNEYKLLVAAVDADDGFFVAFNVVEDENYESWV  
WFLTKLRIALQYHNYPLNDMTFLSNGQKGLDAVPHAFEDSHHAFCLHHIMEEFKGEELRK  
GPWSQQIRDVMVEDFTRAAQACNTDDFNASIESIRNISTEAADWIIASKPEHWSDAVFGG  
CRYDHFSSNIVDAFNWIPTKKEGSMVLMMSLRIKIMETIEARREACKSWEGPLTPSMD  
YKAQDEMSKAGKLTVLCSETVFEVRGSGISVVNLANWECTCRRWQLSGLPCMHAFVFN  
RIGISFYDYCSKFFRIESYHSTYSGTIFPIPDMDTDFDSAGATIPPPKPRTSKPRKKRF  
NPNKIRVHAAQIQ

>Bd7

MAEGGIVVAICQYGGFETSGPNGLIYKGGEAHAVDVSREMSLDSFKDEVSKVFHVDVDM  
MSFKYFLPNNRNLITISCDKDLQRMVDFASAAQADVVISRVENRSIVTYSGALTVKP  
GSSANGDKRKRPSPKKASKSNTNTPTATATAVQANTNDVNQPRPVVTLNDYNGDFQLEF  
GHDVALATTAEVSSAPDVLNQEKLALVDNTPRDPVGLFDDAINAYDGEIIDIPPQEFN  
DNPTVSWDDIIKGVGQEFDNVKDFRAQLCKYAIKGFVYRFIKNETTRVTVKCVGDGCTW  
RLHASESSRNKFKVKKMTGEHTCGGGDGEQRRATRQWLTVIKEKLSKNSLLKPKDLV  
NEIYEGYGVLLTYSQVWRGREVAQKEMFHVRETFGHLPWYKERLLQTNPGSILDLGLA  
DTKFRFFFVAFHASLYGFANGCRPLLFLDKVPLKATNEYKLLVAAVDADDGFFVAFNV  
VEDENFDSWVSFLTNLRFALHNYPLNVMTFLSNGQKGLDAVPHVFEVSHHAFCLHHI  
MEEFKGELKKGPSQQIRDAMVEDFTRAAQACSIDDNFASIESIRNISTEAADWIIASKP  
EHWSDAIFAGCRYDHFSSNIVDAFNWIPTKKEGSMVLMMSLRIKITETIEARREACMS  
WSGPLTPSMDYKAQDEMAKAGKLIIVLCSETVFEVRGSGIFVVNLANWECTCRRWQLSGL  
PCMHAVAVFNIRIGSFYDYCSKFFRIESYHLTYSGTIFPIPDMSDFDTAGATIPPPKPR  
TSDKPRRKRINPNKTTTLIRLCSRCKQVGHNKATCEAIL

>Mg1

MSNHNVLGQNNAIPLNRIQHVVLRNHNHMVIAQNHVLEIGQTHEQETELVQTHDQQVD  
NGDEFEQQNGLSIEEKPDQEELDISDQDELAISETQELDENMELAIHHEDMTMDSMHDDD  
EMGLHHLVLPSPHVIQRTLALTPNFEIHVGQEFDPVRRACRRALRDTAIALHFEMQTIK  
SDKTRFTAKCANESCPWRIHAAKLPGVPTFTIRTINDSHTCGGIGHLGHQASVQWVANS  
VEQRLRENPNCKPKEILEEIHVRHGITLSYKQAWRGKERIMSAMRGSFEEGYRLLPQYCE

QIKRTNPGSIASVYGNPADNCFKRLFISFQASMYGFLNACRPLLGLDRTFLKSKYLGTL  
LATGFDGDGALFPLAFGVVDEESDENMMWFLSELHNLLEVENTENMPRLTILSDRAKGIN  
GVEANFPTAFHGFMRHLSSEFRKEFNNTMLVNLWEAAHALTVIEFDNKILEIEEVSQD  
AAYWIRRLPARLWATAYFEGTRFGHLTANIVESQNSWILEDGLPIIQMMECIRRQLMTW  
FNERRETSMQWTSILVPTAERRVAEALERARTYQVLRANEAEFEVISHEGTNIVDIKNRC  
CLCRGWQLYGLPCAHAAVALLSCRQNVHRFTESECFVATYRKYSQTIHPIDKTLWTEL  
SEGDVDKVSEMVIHPPKSLRPPGRPRKKRVRAEDRGRTKRVVHCSRCNQTGHFRITCAAP  
I

>Mg2

MVRREICHWLRTRTSASSTVITPPIQQCRSFPPLAHNHEPDINLRSLDDESELGLEHDINH  
EDYFLAPPIDNELDIPHVQDGEYHNEYDQGS DHENKYE LDDQKTL DVESIETKINEDDSV  
TDRQLSLASQSNELGFVENNLSL TEHGEVDSNLEL SAHQNPDMVSSHL SVLQPGYVITS  
PIVQSRTVIPAPVQELTVGQEFDPVKSRRALRDMALHFEIQTVKSDKTRFTAKCASD  
GCPWRIHAAKLPGVPTFTIRTIHSEHNCGGIAHLGHQQASVQWVASSVEQRLRENPHCKP  
KEIL EEIHRVHGITLSYKQAWRGKERFMASFRGSFEEDYRLLPQYCNQIRRTNPGSMASV  
CVNPVDNSFLRLFISYQASIYGLNACRPLIGLNRTVLKNKYLGALLFATGFDGDGELFP  
LAFGVVDEENDETMMWFLSQLHNLLETNTGNMPRLTILSDRRKICVDAVESNFPTAFHGL  
CMLHLSENFRKEFNISL CNLLWEAANAPTESEFSAKICQIAETSQDAAYWLQQQFEPRL  
WASSYFEGTRFGTLTADVGLNSWILEASGMPVQMMESVRRQLMTW FNERREASMQWN  
SVLVPSAEQRVAEAVECSRMFQVTRANDMEFNVITGKGNQVVDIRRWL CSCRGWQLYGV  
CSHAAAALIFCKQNVHRAEAGCFVATYRKYSQTIHPIDRTVWHEMCGGGGEEEEIEV  
VVNPPKSLRPPGQPRKRAAQSGDRSGGQAAKRVVHCSRCYQTGHFRITCATPI

>Mg3

MEGHDFIIGQEFDPDKAFRNAVKETAIAQH FELRILKSDLIRYIAKCAAEGCPWRIRAVK  
LPNAPTFTIRSLDGTHTCGKNAHTGHHQASVDWIVNFI EERLRENVNYKPKDILRDVYEQ  
YGITIPYKQAWRAKERGLQSIYGSSEEGYFLPLPYCEQIKKNPKSIAEVFTSGSDNRFQ  
RVFISFYASIKGFLNGCLPIIGLGGIQLKSKYLGTL LSATSFDDGGGLFPLAFGVVDVES  
DESWMMWFLSELRKALEMTEIVPQITFLSKWQNGVGDAAKRFPTSCHAVCMKHLTESIV  
REFKNPRLVQLLWKATYATSNI GFKEKMEIEEISSEARNWLQQNYPPSRWAMMYFDGAR  
FGHLSSTDEFNQWVLEARELPITQVIEIQTKLMVEFEERRAKSKTWF SVLTPSAEKHV  
IEAVNLASTYQVLRSDVEFEVL SAERSDIVNIGSNCSGCCGWEMCGLPCSHGVAALLFS  
RKDVYAFTGNKYFTTASYCAAEEEEIHCVPKTEL IKEGETTLDGEIRSVRPPKVRKPPG  
RPEKRCMIEDFNREKHTVHCSRCNQTGHYKSTCKSDGCKSVLAQI

>Mg4

MAEHDSSTAPANV DATVTLAVQLAENVPD SGVDEGLSLVSHTLSIGQEFDPDVT CRRT  
LKDIAIALHFEIRIVKSDRSFI AKCSKDGCPWRVHVAKCPGVPTFTVRTLHAEHTCEGV  
QNLHHQASVGVARSVEARVDRNPQYKPEILQDIRDQHGVAVS YMQAWRGKERSMAAL  
HGT YEEGFKLLPAYCEQIKKTNPGSIASIVATGQENSFQRLFVSFRAAIYGFINACRPLL  
ELDRVNLKGKYLGLFCAAIDADDALFPLAVAIVDVESDENMMWFMSLRKLLGVNTDA  
MPRLTILSERTMGMAEAVETHFPNAFHGFCLRYISENFRDFTFKNSKLVNIFWNAVYALTT  
AEFESKISEMVQISEDVLPWFHFNPLWALAYFEGVRYGHFTLTVTELLYNWALECHEL  
PIVQMV EHIRHQLSSWFNDRRLGMRLTSILVPSAEKRIAEAISDSHCYKVL RANEVEFE  
IVSTERTNIVDISTRVCSRRWQLYGLPCAHAAAALISCGQNAHLFAEHCFTVHSYRETY  
SQMIYSIPDKSMWKENGEGIEGGAKVEITIRPPKTRRPPGRPKKKVLRMESLKRPKRVV  
QCGRCHMLGHSQKCTLPM

>Mg5

MATKKIIAICQSGGEFETNKDDGSLFYTGGEAYALDL DHKTQLKDFKRELAETFQFRAAA  
LSIKYFLPGNRKTLITISKDKDLKRMVNFKDTQVEVFVVAEEVDVAAPNVSNMPASSQ  
SGLPVS DAHVL YILDF TALMLLNL IHVVIFFNASKIFSTPLAHL TYPFIVFVLSHLKET  
ETSCFVIKLVFLRLIIMKSSRSRTTVSAAAVPSDVPVDMQTDDAIVLDEPIETTPLGA  
CSFSNEDRHRAATQWENIITGVDQRFNTFAEFREALHKYSIAHGFTYKYKKNDSHRVTA  
KCKTEGCPWRIYASRLATTQLICIKMNPEHTCEGATVKAGYRATRIGWIGNIIEKLVKVS  
PNYKPKDIASDIKREYGIQLNYTQAWRAKEIAREQLQGSYKEAYSQLPFFCQIMETNPG  
SLATFSTKEDSSFRFFVFSFHASISGFHQCRPLLFLDSTLLYSKYQGTLLAATAADGNDD

FFPVAVAVDEETEDNWNWFLTELKSALSTSEQITFVSDFFQKGIKNSLIEIFGNECYHGY  
CLRSLAEKLNKDLKGQFSDHARRLMVQDFYAAAYAPKIEVFERCAENIKAISIEAYDWVI  
RSEPEHWANAIFFGARYNHMTSNFGQQFYGWVSEVDELPIQMVVLDLGGKIMELIYRRRL  
ESSQWVTRLTPFMEDKLQLEMSKRSFQVALAHTSTFEVRGGESVDIVDIDHWDCSCKGW  
QLSGLPCCHAIIVILCLGRSLYEYCSRFFMTESYRLTYTESINPIPNVEKPERSELHEAT  
IVTPPPTKRPPGRPKLSAESADVIKRLQCTVRELRVNGVVEEPTPILTVLGTEEPE  
GSS

>Mg6

MATKKIIAICQSGGEFVANKDDGSLFYTGGEAYALDLDHQTQLKDFKHELAETFQFSARA  
LSIKYFLPGNRKTLITISKDKDLKRMVNFVKDQVEVFIIEEEEEAAAPNVSNMPASRS  
SRTTVSAAVSDVPVDMQTDVAIVLDEPISNEDRHRAATQFNFAEFREALHKYSIA  
HGFTYKYKKNDSHRVTAKCKTEGCPWRIYASRLATTQLICIKMNPHEHTCEGATVKAGYR  
ATRGWIGNIIEKLVSPNYKPKDIASDIKREYGIQLNYTQAWRAKEIAREQLQGSYKEA  
YSQLPFFCQIMETNPGSLATFSTKEDSSFRFFVFSHASISGFHQCRPLLFLDSTLLYS  
KYQGTLLAATAADGNDDFFPVAVAVDEETEDNWKWFLSELKSALSTSEHITFVSDFFQK  
IKQSLIDIFGNECNHGYCLRSLAEKLNKDLKGQFSDHARRLMVQDFYAAAYAPKVEVFER  
CAENIKAISIEAYDWVIRSQPEHWANAIFFGARYNHMTSNFGQQFYVWVSEVDELPIQMV  
VDVLDLGGKIMELIYRRRLSSQWVTRLTPFMEDKLQLEMSKRSFQVALVHGSTFEVRGGE  
SVDIVDIDHWDCSCKGWQLMGLPCCHAIIVINCLGRSLYDFCSRFFTTESYRLTYTESIN  
PIPNVEKPERSELHEATIVTPPPTKRPPGRPKLSAESVDVIKRLQCSKCKGLGHNKKT  
CYKVNNGVVEEPTPTLTVLGTEPEGSS

>Mg7

MVVKKIITICQSGGEFETDADGVISYKGGDAHAMEIDDKLKFIDLKSEVAEMFGCNLGT  
AVKYFLPGNKKTLISISNDKDLKRMKIFHNSDTAEIYVVTEEVAAPDVSQMPGSRSSRT  
TLSEAGVGPVPEPSRSTINNIIVDDINEPDPLVDSTFDVVGDNTVSTEVVPSDFPTPIAF  
ASPYDEKLAKAAQQWQNNITGVGQRFNSVHEFREALRKYAIAHQFQAFKYKKNDSHRVTVK  
CKAEGCQWRVHASRLSTTPLICIKMNPHTCEGSLATGYQATRSWVASIIEKLVFP  
NYKPKDIVTDIKEYGVQLNYFQAWRGKEIAKEQLQGSYKEAYSQPYLCEKIMETNPGS  
LASFATKEDSSFHFLFVFSFRASLYGFEQGCRRPLLFLDSIFLKSQYQGSLLAATAADADDG  
FFPVAVAVVNESDENWKWFLQQLKTALSTTPRGLTFVADREKGLKESIAEIFQGGQEVYH  
AYCLRYLSEQLIRDLKGQFSHEVKRIIQDMFTAHAHAPTEQIFKYCVDSIKAISVTAYNW  
IMQSDPETHWANAFFGARYNHMTSNFGELFYSWVSDAHELPIQLVDAIRTKIMELVYSR  
HMEALDWMRRLTPSMEKKLEKENLNVRALEVSLGDRIEVRFENSQIVNVDRWECSCR  
WQLTGLPCCHAIIVIMCLQRDPYDFCSRFFTTESYRLTYAETLNPISNSDGMWQKGEST  
QIVTVTPPPTRRPPGRPTTKRVSSQEVGRRQLQCSRCKGIGHNKSTCKEFLLEC

>Mg8

MAKGLLILICQSGGKFVTKGDSTLSYEGGEANAVNIIHETVFDLKLKVAEMCNLNQKTI  
SVKYFLPGNRRNLISLRNDKDLKRMIDFHANSVTADIFVDGEVGFHDHAIKLQASRNSAL  
KLAETVNHITAPTTAATPVVNNRKGADPRVHAHAGSKAAARKVVDSSSPGETYASPQS  
SEHGTDSDSEYKPRVAVSVDADQDLSDLDMTCGPADTVKRRRRRTASWTMGARGPTIVAVS  
DSDRERRRRKNNQSRHEHETDDILGIDDLGNPSSPGFSDDDLPEKLVASWRDCITGVGQ  
DFKSVKEFREALQKYAIAHRFVYKLNKNSNRASGICVEEGCTWSIHASWVPASLLFRIK  
KLNDTHTCGGESWKNAPAKLLVSVIKDRLRDSPHDKPREIARSISRDFGIELKYTVR  
RGIEGAREQLQGSYKESYSRLPWFCLEETNPGSFVKLLTDDEKRFQCLFVSFLSCVQS  
FEKNCRPILFLNATSLKSKYHESLLTATAVDADDGFFPVAVSIVNNENEDNWHWFLEQLK  
SALSSSVPLTFVSDRDKGLEKAVHEIFENAHHGYSMYHLIESFKRNLKGPFGQEGRGVLP  
GKFLSAAHALRQSVFKKFEQIKQISPSAYDWVTQVEPEHWTSLSFRGEQYNYIIQNVAE  
PYTKLMDEIKESTLMQKIEALIYMISEVINTRRISSNWTAKLTPSKEKMQGEALKAHR  
LRLFISSDVLFEVHDESTHVNIKLECTCLEWKGTSIGIPCRHAIALNSSGKGVYDYCS  
KYFTVESYQLTYRESINPIPIGLPLVKEDAESDDVKVLPAPRPASEQKKEQSKIEDPD  
KRTVTCCKECPGHNKASCKATS

>Sb1

MASHELVLGHGQDAELALGPNHHDGQDHGLGLGHSHELDELGGHAHDHELVLGQSHEHDH  
QLVLGHHHDDHQLVLGHDHGHGHVGEALALRQGHGDSGALALEVQGHHDDELDES

HELTLAETHHLGVDENLDQLSLEQAHELALQPHDLSQGPLAVAPVVQSRMVSPEFQLQ  
VGQEFDPVMSCRRAIRNTAIACHFEIQTVKSDKSRFTAKCAAACPWRIHAAKLPGVPTF  
SIRTIHDNHSCVGINHLGHQQASVQWVANTVEERLRENPOCKPKEILEEIHKAHGITLSY  
KQAWRGKERIMAAVRGSFEEGYRLLPEYCRQVERTNPGSIARVYGNPDDNCFRRLFISFN  
ASIFGFVNACRPLIGLDRTLLKNKYLGTFLATGFDGDGALFPLAFGVVDEETDENWVWF  
LSELHELLEKNTENMPRLTILSDRRKGITDGVFNFTAFHGYCMRHVSETFKKEFNPNV  
LVNLLWEAAHALTVIEFETKLEIEDTSSEAVVWIRHLPRLWATAYFEGTRYGHLTANI  
TESLNSWILDASGLPIIQMMECIRRQLMTWFNERREASMQWNTILVPAEERRVQEAIERA  
RGYQVARANAEFEVISAHEGTNIVDIRNRCCLCRGWQLYGVPCAHGVAALLSCRQNVHR  
YTESCFTVATYRKYSQTIHPDPKTLWNETADHEVADQQAETKMEMVINPPKSLRPP  
GRPRKKRIRAEDRGRVSRVHCSRNCQNGHFRTTCAAPI

>Sb2

MEGDQILVQAEQNLIPGAQTLVIGQEFADVDTCRKAIKDMAIALHYELRVVKSDRSRFIA  
KCSKEGCPWRVHIAKCPGVPTFTVRTLHGEHKCEGVLNLHHQQATVGVVARSVEARLRDN  
PQIKPKEILQDIREQHGVAVSYMQAARGKERSMAAVNGTLEEGYHFLPAYCGQIVKTNPG  
SVATYRIGIPGNAFQRLFVSFRASIYGLNGCRPLLEIDKADLKGKYLGTLLCASAIDAD  
HMMFPLAFGIVDSESDDNWVWFISELRKMLGVNTDKMPVLTILSERKSQVVEAVGSNFPT  
AFHGFCLRYVSENFRDEFKNTKLLNLFWSAVYALTPSEFDAKVNEMMQVDIMPWLQRF  
PNLWAVSYFQGIYGHFSLGITEILYNLSDCHELPIVQTIIEHIRHQLTCWFAERQNLAQ  
SYNSVLVPSAEKLISEAIDHSQCYQLRANKVEFEVVSERTNIVDTQARS CSCRRWQIY  
GIPCAHAAAALLSCGEDPRLYAHDCFSVMKYRETSQPIYIPDRSHWNNSPGLQGVVS  
KADVILSPNIRPPGRPKMKILKIESMKRPKRIIQCGRCHLLGHSQKCKSLRI

>Sb3

MARGQILAVLQIGGEFTTDEDGHMSYSGGEAHAMHVQSDWTFSAFKQEISSTLNNLKL  
FAFKYFLPKNDKTLISISNDKDLRRMVEFHAESDSTYIYVMKADNRSKSIVAVSATPTD  
AFAISPTTQDQSKRQKVCASWKNVITGVGQVFEGPKDFRDALHKYAIHRFHRYFIKND  
SRVTAECTGEGCPWRHASKSPAKKEFMIKKISESHTCESETVKS NRLASQRWVASVIKE  
KL RDSPNYRPRDIANDLQREYGLCLNYSQAWRGRSIAQKELYSTHEEACSQLPWF  
CERIVETNPGSVATVVALEDSKFRFFVAFHASLHGFEHGCRPLLFLEAITAKPNKH  
WKLAAASVDGEGDVFPVAFGVVDESRENWVWFLEQLKSSLTGTSRTITFISNGEHL  
WDVVSSVVFQESHGVCVESLIEEFKTLQDDALTEELKDSMVEHLKKAISYCTADEFN  
QYIELIKSESDKLA DWLLEIKPDQWSDAFFKGSRHGQYSCNVFGTVSEWIPTRYEL  
SVVQLVDTIRCKLMEMMY TRRESSNAWTEVLTPAANQKLEEVNKAHTLNVLPAEN  
DENGMFKVCDSDSVNVNLDTW ECTCQRWHISGLPCMHAIAVLDRTGQYAYDYCV  
KYFTTACYRLTYSLSINPIPDVVVPT LIDPAQSPATYPCPLRTRRRVGRPK  
EKPADPRIAIKRAVRC SRCKGYGHNKATCKVPVST

>Sb4

MADGGIVVAICQYGGFTSGPNGLTYKGGEAHAVDVS RDMPLESFKDEVSKV  
FHV DVT DMSLKYFLPNRYRTLITISCDRDLQRMVDFTISAAQVEVFLISR  
VENRSVVYTS GASAIKPGSNAPGDKRKKPPSKNKVSKSNKKTPTPSAPGTSV  
QPSASNVKQPRPIVTDNDDNRVFL EFGSDVAFATPAGGASTAPGVL  
DQQLALVDTAPREPIGLFDDSGDPYVGEITADPQHG LDNPVMFWDDI  
IKGVGQEFDNVDFRAQLCKYAIIGKFAYRFIKNETTRVTVKCV  
AEGCTWRLHASESRNKKFVIKKMTDEHTCGGGNGEGQRRATRQWL  
TTVIKEKLDHNPMMKPKDL VKEIYEYGVTLTYSQVWRGKEVAQKEL  
YHAIRETYSHLPWYCERL TESNPGSIALLSPM VDTKFRFFVAFHASL  
HGFTNGCRPLFLDKVPLKATNEYKLLVAAVDADDGVFPVAFS  
VVEDENYESWVWFLMQLKFP IQNHSYAYTMTFLSSGQKGLDAAVSQV  
FGDSHAFCLHHI MEEFKGELRKGPSQQIRDGMIEDFTRAAQAC  
SIEDFNASIESIRNISTEAAEWIASKP EHWSDAIFRGC  
RYDHFSSNIVDAFNWIPTKKEGSIVLMIDSLRTKIMEI  
IETRREACKA WSGPLAPSMEYKAQEEILKAGKMTVLC  
SSETVFEVRGNAIFVNLANWECTCRRWQLSGL PCLH  
AVAVFNIRGSFYDYCSKFFRIESYHMTYSGTIFPI  
PDMDTVDFSAGANLIPPKPRTSDKPRRRLNPNKI  
PTVIRLCSRCKQAGHNKATCEVIL

>Sb5

MGSRQIVAVLQVGGEF SRDDGRMSYGGGEAHAMHVKSDWAFKAFKHEISS  
TLNNLKLDS YVFKYFLPRNDKTLISISNDKDLKRMVEFHA  
ESETTYIYVMKADNRKLSIAGADAPAD CAVIATTPD  
GSKRQKICASWENAITGAGQVFQSAKEFRDAL  
HKYAIHRFHRYKFKVNDSS

RVTAECTDGGCAWRIHASKSHSKEFMVKKVFGTHTCESETIKSHRLASQKWWASVIKEKI  
RDSPNYRPRDIANDLQREYGLCLNYSQAWRGKAIARKELYSSDEEACNQLPWFCQRVVET  
NPGSVATVVTLEDSKFRFFVAFHASLHGFEHGCRHLLFLDVISVRSNKHKKLLAATSVDG  
EGDIFPVALSVVDDENQENWHWFLEQLNDSL PALGATTFISNGKGLWDEVSLIFPDSYH  
GYHVNCFIEEFKQLDGSWSEEVKMMVAHLEKAIYSCKVDEFNQYVELIKTESDKLAEW  
LLETKPERWSDAFFKGSRLGQYTCNVSETISDWIPSRYELSVVQLVDTIRCNLMEMMYTR  
RESSNTWTEVLTPSANQKLQEQMNKALTL SVVCSTGNDGNGHVFEVCDDSVNVNIDTWE  
CTCRRWHVSGIPCSHAIAVDRTEQCPLDYCSKYFTTECYRLTYAMSINPIPDVFPVPTAA  
GDPSQGTLLSSPILTRRQVGRPKKPADPRIAIKRAVRCSRCKGYGHNKATCKVPISD

>Sb6

MADGAIVVAICQYGGEFASGSPGNLIYRGGEAHAVDVTRDSSLEGFKDEL SKVFHVDVTD  
MSLKYFLPNMKTLITISCDRDLQRMVDF TANA AHVDVFLISRQENRSIVTQSGATSGSV  
ASGDKRKRPTSKNKVIRSSKPAASAPGNAVQVITDSL RQPI SVTTENEDNRVFQLEFGND  
IAFTTTAGGASFTSDILDQQLALVDNIPREAVSLFDDAFIPYVGSEIMHEPQGPNNPIA  
LWDDIIGVQGEFDNVKDFRAQLCKYAI GKGFVYRFIKNETSRVTVKCAAEGGCTWRLHA  
SESSRNKFFVIKRMTDEHTCSGGSGEGRRATRQWLTTIIKEKLHDNPKFKPKELVKELF  
EEYGVTLTYSQVWRGKEVAEKEYHAIRETRDQLPWYCRLEETNPGSISVLSPVVDMKY  
RRFFVAFHACLHGFEVNGCRPLFLDKVPLKATNDYKLLVAAAIDADDGVFPLAFNVVEDE  
NYDSWGWFMLHLKIALQTHNYPCNGMTFLSNGQMGLDAVSHVFE DGKHAFCLHHIIEEF  
KGELRKGPWSLQIREGMVEDFTRAAQACNIEDFNASIESIRNISSEAADWIIASKPEHWS  
DAIFRGCYDNFSLNIADAFDNWIPTKKESSIVLMVDSL RMKIKEIIESRLEACKAWEGP  
LTPTMEYKVDQEMLKAGKMTVLCSETVFEVRGNATFVVNI GNWECTCRRWQLSGLPCMH  
AIAVFNRLGRNLYDYCPKFFRIESYHLTYSGIIFPIPDMDSVDF SAGANLLPLPPKQRSS  
DKPRRKRNSNKISTLVRLCSRCKQTGHNKATCEVQF
