# Supplementary material for: A Gene Family Derived from Transposable Elements during Early Angiosperm Evolution Has Reproductive Fitness Benefits in Arabidopsis thaliana
Source: PubMed Central journal article supplement (PMC3435246; doi:10.1371/journal.pgen.1002931), 2012-09-06
Supplement: pgen.1002931.s004.pdf [file pgen.1002931.s004.pdf]

**Table S1.**

| Species                        | MUGA   |             | MUGB   |             |      |
|--------------------------------|--------|-------------|--------|-------------|------|
|                                | # ESTs | Best EST ID | # ESTs | Best EST ID | PB1? |
| <i>Zamia furfuracea</i> *      | 0      | -           | 0      | -           | -    |
| <i>Amborella trichopoda</i>    | 6      | b4_c19700   | 0      | -           | -    |
| <i>Nuphar advena</i>           | 14     | b3_c12933   | 6      | b3_c8318    | yes  |
| <i>Aristolochia fimbriata</i>  | 4      | b3_c15276   | 0      | -           | -    |
| <i>Liriodendron tulipifera</i> | 9      | b3_c14809   | 6      | b3_c2867    | yes  |
| <i>Persea americana</i>        | 5      | b4_c28181   | 1      | b4_c26687   | no   |

\* *Zamia furfuracea* is a cycad, a non-angiosperm seed plant.
