# Supplementary material for: A Gene Family Derived from Transposable Elements during Early Angiosperm Evolution Has Reproductive Fitness Benefits in Arabidopsis thaliana
Source: PubMed Central journal article supplement (PMC3435246; doi:10.1371/journal.pgen.1002931), 2012-09-06
Supplement: pgen.1002931.s005.pdf [file pgen.1002931.s005.pdf]

**Table S2.**

| <b>Taxon*</b>                              | <b># ESTs in DB</b> | <b># MUG ESTs</b> |
|--------------------------------------------|---------------------|-------------------|
| <b>Tracheophyta, except Euphyllophyta</b>  |                     |                   |
| Lycopodiophyta (club-mosses)               | 101,292             | 0                 |
| <b>Euphyllophyta, except Spermatophyta</b> |                     |                   |
| Moniliformopses (ferns)                    | 241,806             | 0                 |
| <b>Spermatophyta, except Angiosperms</b>   |                     |                   |
| Coniferophyta (conifers)                   | 1,079,016           | 0                 |
| Cycadophyta (cycads)                       | 42,674              | 0                 |
| Ginkgophyta                                | 21,590              | 0                 |
| Gnetophyta                                 | 20,853              | 0                 |
| <b>Basal Angiosperms</b>                   |                     |                   |
| Amborellales                               | 26,378              | 1                 |
| Nymphaeales (water lily)                   | 23,686              | 3                 |
| Austrobaileyales                           | 233                 | 0                 |
| <b>Magnoliids</b>                          |                     |                   |
| Piperales                                  | 27,489              | 2                 |
| Laurales                                   | 17,425              | 1                 |
| Magnoliales                                | 24,132              | 6                 |
| <b>Monocots</b>                            |                     |                   |
| Acorales (sweet flag)                      | 9,695               | 0                 |
| Alismatales                                | 16,059              | 0                 |
| Dioscoreales                               | 44,165              | 4                 |
| Pandanales                                 | 1,377               | 0                 |
| Liliales                                   | 5,070               | 2                 |
| Asparagales                                | 63,186              | 7                 |
| <b>Monocots - Commelinids</b>              |                     |                   |
| Zingiberales                               | 82,191              | 4                 |
| <b>Dicots</b>                              |                     |                   |
| Ranunculales                               | 124,797             | 21                |
| Proteales                                  | 2,238               | 0                 |
| Saxifragales                               | 11,044              | 1                 |
| <b>Dicots - Rosids</b>                     |                     |                   |
| Caryophyllales                             | 105,737             | 6                 |

\* Most taxa are orders, except Lycopodiophyta, Coniferophyta, Cycadophyta, Ginkgophyta, and Gnetophyta which are divisions, and Moniliformopses, which is a subdivision.
