# Supplementary material for: A Gene Family Derived from Transposable Elements during Early Angiosperm Evolution Has Reproductive Fitness Benefits in Arabidopsis thaliana
Source: PubMed Central journal article supplement (PMC3435246; doi:10.1371/journal.pgen.1002931), 2012-09-06
Supplement: pgen.1002931.s008.pdf [file pgen.1002931.s008.pdf]

**Table S5. MUG loci.**

| Species              | Label              | Locus ID* or Location               |
|----------------------|--------------------|-------------------------------------|
| <i>A. thaliana</i>   | AtMUG1             | AT3G04605                           |
|                      | AtMUG2             | AT2G30640                           |
|                      | AtMUG3             | AT1G06740                           |
|                      | AtMUG4             | AT5G16505                           |
|                      | AtMUG5             | AT3G06940                           |
|                      | AtMUG6             | AT5G48965                           |
|                      | AtMUG7             | AT3G05850                           |
|                      | AtMUG8             | AT5G34853                           |
| <i>C. papaya</i>     | Cp1                | supercontig_123:394,808..396,589    |
|                      | Cp3                | evm.TU.contig_37041                 |
|                      | Cp4                | supercontig_20:790,047..791,450     |
|                      | Cp5                | evm.TU.supercontig_146.19           |
|                      | Cp6                | supercontig_48:1,209,999..1,212,321 |
|                      | Cp7                | supercontig_277:54,949..57,928      |
|                      | <i>V. vinifera</i> | Vv4                                 |
| Vv5                  |                    | chr14:363,591..365,978              |
| Vv6                  |                    | chr7:480,947..483,202               |
| Vv9                  |                    | chr4:15,764,692..15,766,497         |
| Vv10                 |                    | chr3:9,310,218..9,311,966           |
| Vv11                 |                    | chr5:2,688,167..2,690,716           |
| Vv12                 |                    | chr11:5,970,313..5,972,772          |
| <i>M. guttatus</i>   |                    | Mg1                                 |
|                      | Mg2                | mgv1a002269m.g                      |
|                      | Mg3                | mgv1a023335m.g                      |
|                      | Mg4                | mgv1a006200m.g                      |
|                      | Mg5                | mgv1a001707m.g                      |
|                      | Mg6                | mgv1a002150m.g                      |
|                      | Mg7                | mgv1a001676m.g                      |
|                      | Mg8                | mgv1a001259m.g                      |
| <i>M. truncatula</i> | Mt1                | Medtr1g094000                       |
|                      | Mt2                | Medtr7g143350                       |
|                      | Mt3                | Medtr8g133990                       |
|                      | Mt6                | Medtr4g122010                       |
| <i>O. sativa</i>     | Os1                | LOC_Os12g40530                      |
|                      | Os2                | LOC_Os02g09900                      |
|                      | Os3                | LOC_Os06g42640                      |
|                      | Os5                | LOC_Os01g41210                      |
|                      | Os6                | LOC_Os10g01550                      |
| <i>B. distachyon</i> | Bd1                | Bradi2g19940                        |
|                      | Bd2                | Bradi1g23870                        |
|                      | Bd3                | Bradi2g02790                        |
|                      | Bd4                | Bradi1g35585                        |
|                      | Bd5                | Bradi3g06710                        |
|                      | Bd6                | Bradi2g03540                        |
|                      | Bd7                | Bradi2g36990                        |
| <i>Z. mays</i>       | Zm1                | GRMZM2G423238                       |
|                      | Zm2                | GRMZM2G320452                       |
|                      | Zm3                | GRMZM2G164709                       |
|                      | Zm4                | GRMZM2G363704                       |
|                      | Zm5                | GRMZM2G034372                       |
|                      | Zm6                | GRMZM2G130905                       |
|                      | Zm8                | AC234109.1_FG003                    |
|                      | <i>S. bicolor</i>  | Sb1                                 |
| Sb2                  |                    | Sb03g002010                         |
| Sb3                  |                    | Sb10g024700                         |
| Sb4                  |                    | Sb01g027410                         |
| Sb5                  |                    | Sb04g006220                         |
| Sb6                  |                    | Sb05g027680                         |

\* Locus ID is given wherever a single locus covers most of the MUG sequence (even if the corresponding model does not perfectly match the predicted MUG sequence).
