# Supplementary material for: A Gene Family Derived from Transposable Elements during Early Angiosperm Evolution Has Reproductive Fitness Benefits in Arabidopsis thaliana
Source: PLoS Genet. 2012 Sep 6;8(9):e1002931. doi: 10.1371/journal.pgen.1002931 (PMC3435246; doi:10.1371/journal.pgen.1002931)
Supplement: Table S4 — DDE motifs of MUG proteins. Only variant residues are shown. (PDF) [file pgen.1002931.s007.pdf]

Table S4.

| Clade | MUG    | D(1) | D(2) | E(3) |
|-------|--------|------|------|------|
| A3    | Mg3    | G    | K    | -    |
|       | Mt6    | G    | -    | -    |
|       | Cp4    | G    | -    | -    |
|       | Vv10   | G    | -    | -    |
| A2    | Zm3    | -    | E    | -    |
|       | Zm4    | -    | E    | -    |
|       | Sb2    | -    | E    | -    |
|       | Os5    | -    | E    | -    |
|       | Bd3    | -    | E    | -    |
|       | AtMUG4 | -    | E    | -    |
|       | Mg4    | -    | E    | -    |
|       | Mt2    | -    | E    | -    |
|       | Vv9    | -    | E    | -    |
|       | Cp1    | -    | E    | -    |
| A1    | AtMUG3 | -    | S    | -    |
|       | AtMUG2 | -    | S    | -    |
|       | Cp3    | -    | N    | -    |
|       | Mg2    | N    | -    | G    |
|       | Mt1    | -    | -    | -    |
|       | Vv6    | -    | -    | -    |
|       | Mg1    | -    | -    | -    |
|       | AtMUG1 | -    | -    | -    |
|       | Vv4    | -    | -    | -    |
|       | Bd2    | -    | -    | -    |
|       | Bd1    | -    | -    | -    |
|       | Os1    | -    | -    | -    |
|       | Sb1    | -    | -    | -    |
|       | Zm1    | -    | -    | -    |
|       | Zm2    | -    | -    | -    |
| Bd2   | AtMUG7 | -    | -    | -    |
|       | Mg7    | -    | -    | -    |
|       | Cp6    | -    | -    | -    |
|       | Vv5    | -    | -    | -    |
| Bd1   | AtMUG5 | -    | -    | K    |
|       | AtMUG6 | -    | -    | L    |
|       | Mg5    | -    | -    | Q    |
|       | Mg6    | -    | -    | Q    |
|       | Cp5    | -    | -    | Q    |
|       | Vv11   | -    | -    | Q    |
| Bd3   | Mt3    | -    | -    | Q    |
|       | AtMUG8 | -    | -    | -    |
|       | Vv12   | -    | -    | H    |
| Bm1   | Mg8    | N    | -    | -    |
|       | Zm8    | -    | N    | D    |
|       | Sb6    | -    | N    | D    |
|       | Os6    | -    | S    | D    |
|       | Zm5    | -    | S    | D    |
|       | Sb4    | -    | S    | D    |
| Bm2   | Bd7    | -    | N    | D    |
|       | Bd6    | -    | N    | D    |
|       | Os3    | -    | N    | S    |
|       | Zm6    | E    | N    | G    |
|       | Sb3    | E    | N    | G    |
|       | Bd4    | -    | N    | N    |
|       | Os2    | -    | N    | -    |
|       | Sb5    | -    | N    | -    |
|       | Bd5    | -    | N    | -    |
